# Supplementary material for: Development of α-glucosidase inhibitors by room temperature C–C cross couplings of quinazolinones
Source: Royal Society of Chemistry journal article supplement (doi:10.1039/c3ob40636a), 2013-01-01

## TABLE OF CONTENTS

| Information                                                                                                                                              | Page |
|----------------------------------------------------------------------------------------------------------------------------------------------------------|------|
| Synthetic scheme for the synthesis of compound ( <b>3a</b> & <b>3b</b> )                                                                                 | S-3  |
| 6-Bromo-2-cyclopropyl-4H-benzo[d][1,3]oxazin-4-one                                                                                                       | S-3  |
| 6-Chloro-2-cyclopropyl-4H-benzo[d][1,3]oxazin-4-one                                                                                                      | S-3  |
| 6-Bromo-2-cyclopropyl-3-(pyridin-3-ylmethyl) quinazolin-4(3H)-one ( <b>3a</b> )                                                                          | S-4  |
| 6-Chloro-2-cyclopropyl-3-(pyridin-3-ylmethyl) quinazolin-4(3H)-one ( <b>3b</b> )                                                                         | S-4  |
| References                                                                                                                                               | S-5  |
| <b>Table 1.</b> Comparison of the rate of formation of 4a                                                                                                | S-6  |
| <b>Figure 1.</b> Comparison of the rate of formation of 4a                                                                                               | S-6  |
| <b>Figure 2a.</b> Insilico Studies-Sequence alignment                                                                                                    | S-7  |
| <b>Figure 2b.</b> Insilico Studies-Sequence alignment                                                                                                    | S-7  |
| <b>Figure 2c.</b> Insilico Studies-Sequence alignment                                                                                                    | S-8  |
| <b>Fig 3.</b> ELISA generated Optical Density (OD) Values                                                                                                | S-8  |
| <b>Fig 4.</b> Screen shot of Calculations of IC50 values in Excel sheet and Screen shot of AGH 96 well pate                                              | S-9  |
| <b>Table 2.</b> Table 2. Physicochemical properties, Lipinski properties, ADMET properties calculated for selected compounds                             | S-9  |
| <b>Fig 4.</b> The predicted binding mode of 4f and 5o to show the pi-pi interaction with the aromatic residue of the active site                         | S-9  |
| <sup>1</sup> H and <sup>13</sup> C NMR spectra of 6-Bromo-2-cyclopropyl-4H-benzo[d][1,3]oxazin-4-one ( <b>2a</b> )                                       | S-10 |
| <sup>1</sup> H and <sup>13</sup> C NMR spectra of 6-Chloro-2-cyclopropyl-4H-benzo[d][1,3]oxazin-4-one ( <b>2b</b> )                                      | S-11 |
| <sup>1</sup> H and <sup>13</sup> C NMR spectra of 6-Bromo-2-cyclopropyl-3-(pyridin-3-ylmethyl) quinazolin-4(3H)-one ( <b>3a</b> )                        | S-12 |
| <sup>1</sup> H and <sup>13</sup> C NMR spectra of 6-Chloro-2-cyclopropyl-3-(pyridin-3-ylmethyl) quinazolin-4(3H)-one ( <b>3b</b> )                       | S-13 |
| <sup>1</sup> H and <sup>13</sup> C NMR spectra of 2-cyclopropyl-6-phenyl-3-(pyridin-3-ylmethyl)quinazolin-4(3H)-one ( <b>4a</b> )                        | S-14 |
| <sup>1</sup> H and <sup>13</sup> C NMR spectra of 2-cyclopropyl-6-(2-methoxyphenyl)-3-(pyridin-3-ylmethyl)quinazolin-4(3H)-one ( <b>4b</b> )             | S-15 |
| <sup>1</sup> H and <sup>13</sup> C NMR spectra of 2-cyclopropyl-6-(3,4-dimethylphenyl)-3-(pyridin-3-ylmethyl)-quinazolin-4(3H)-one ( <b>4c</b> )         | S-16 |
| <sup>1</sup> H and <sup>13</sup> C NMR spectra of 6-(2-acetylphenyl)-2-cyclopropyl-3-(pyridin-3-ylmethyl) quinazolin-4(3H)-one ( <b>4d</b> )             | S-17 |
| <sup>1</sup> H and <sup>13</sup> C NMR spectra of 2-cyclopropyl-6-(3-fluoro-4-methylphenyl)-3-(pyridin-3-ylmethyl)quinazolin-4(3H)-one ( <b>4e</b> )     | S-18 |
| <sup>1</sup> H and <sup>13</sup> C NMR spectra of 2-cyclopropyl-6-(2,6-dichlorophenyl)-3-(pyridin-3-ylmethyl)quinazolin-4(3H)-one ( <b>4f</b> )          | S-19 |
| <sup>1</sup> H and <sup>13</sup> C NMR spectra of Methyl-4-(2-cyclopropyl-4-oxo-3-(pyridin-3-ylmethyl)-3,4-dihydroquinazolin-6-yl)benzoate ( <b>4g</b> ) | S-20 |
| <sup>1</sup> H and <sup>13</sup> C NMR spectra of 4-[2-cyclopropyl-4-oxo-3-(pyridin-3-ylmethyl)-3,4-dihydroquinazolin-6-yl]benzotrile ( <b>4h</b> )      | S-21 |
| <sup>1</sup> H and <sup>13</sup> C NMR spectra of 2-cyclopropyl-6-(3-nitrophenyl)-3-(pyridin-3-                                                          | S-22 |

|                                                                                                                                                             |      |
|-------------------------------------------------------------------------------------------------------------------------------------------------------------|------|
| ylmethyl)quinazolin-4(3H)-one ( <b>4i</b> )                                                                                                                 |      |
| <sup>1</sup> H and <sup>13</sup> C NMR spectra of 2-cyclopropyl-6-(4-(dimethylamino)phenyl)-3-(pyridin-3-ylmethyl)quinazolin-4(3H)-one ( <b>4j</b> )        | S-23 |
| <sup>1</sup> H and <sup>13</sup> C NMR spectra of 6-(3,5-bis(trifluoromethyl)phenyl)-2-cyclopropyl-3-(pyridin-3-ylmethyl)quinazolin-4(3H)-one ( <b>4k</b> ) | S-24 |
| <sup>1</sup> H and <sup>13</sup> C NMR spectra of 2-cyclopropyl-6-(4-(methylsulfonyl)phenyl)-3-(pyridin-3-ylmethyl)quinazolin-4(3H)-one ( <b>4l</b> )       | S-25 |
| <sup>1</sup> H and <sup>13</sup> C NMR spectra of 2-cyclopropyl-6-(2,4-dihydroxyphenyl)-3-(pyridin-3-ylmethyl)quinazolin-4(3H)-one ( <b>4m</b> )            | S-26 |
| <sup>1</sup> H and <sup>13</sup> C NMR spectra of 2-cyclopropyl-6-(3,4-dihydroxyphenyl)-3-(pyridin-3-ylmethyl)quinazolin-4(3H)-one ( <b>4n</b> )            | S-27 |
| <sup>1</sup> H and <sup>13</sup> C NMR spectra of 2-cyclopropyl-3-(pyridin-3-ylmethyl)-6-(2,3,4-trihydroxyphenyl)quinazolin-4(3H)-one ( <b>4o</b> )         | S-28 |
| <sup>1</sup> H and <sup>13</sup> C NMR spectra of 2-cyclopropyl-6-(naphthalen-1-yl)-3-(pyridin-3-ylmethyl)quinazolin-4(3H)-one: ( <b>4p</b> )               | S-29 |
| <sup>1</sup> H and <sup>13</sup> C NMR spectra of 2-cyclopropyl-3-(pyridin-3-ylmethyl)-6-(pyridin-4-yl)quinazolin-4(3H)-one ( <b>4q</b> )                   | S-30 |
| <sup>1</sup> H and <sup>13</sup> C NMR spectra of 2-cyclopropyl-6-(1H-indol-6-yl)-3-(pyridin-3-ylmethyl)quinazolin-4(3H)-one ( <b>4r</b> )                  | S-31 |
| <sup>1</sup> H and <sup>13</sup> C NMR spectra of 6-(benzofuran-2-yl)-2-cyclopropyl-3-(pyridin-3-ylmethyl)quinazolin-4(3H)-one ( <b>4s</b> )                | S-32 |
| <sup>1</sup> H and <sup>13</sup> C NMR spectra of 2-cyclopropyl-3-(pyridin-3-ylmethyl)-6-(thiophen-3-yl)quinazolin-4(3H)-one ( <b>4t</b> )                  | S-33 |
| <sup>1</sup> H and <sup>13</sup> C NMR spectra of 2-cyclopropyl-6-(3,5-dimethyl-1H-pyrazol-4-yl)-3-(pyridin-3-ylmethyl)quinazolin-4(3H)-one ( <b>4u</b> )   | S-34 |
| <sup>1</sup> H and <sup>13</sup> C NMR spectra 2-cyclopropyl-6-(3,5-dimethylisoxazol-4-yl)-3-(pyridin-3-ylmethyl)quinazolin-4(3H)-one ( <b>4v</b> )         | S-35 |
| <sup>1</sup> H and <sup>13</sup> C NMR spectra 2,6-dicyclopropyl-3-(pyridin-3-ylmethyl)quinazolin-4(3H)-one( <b>4w</b> )                                    | S-36 |
| <sup>1</sup> H and <sup>13</sup> C NMR spectra of 2-cyclopropyl-6-isobutyl-3-(pyridin-3-ylmethyl)quinazolin-4(3H)-one: ( <b>4x</b> )                        | S-37 |
| <sup>1</sup> H and <sup>13</sup> C NMR spectra of 2-cyclopropyl-6-methyl-3-(pyridin-3-ylmethyl)quinazolin-4(3H)-one ( <b>4y</b> )                           | S-38 |
| Competitive reaction mixture LCMS results                                                                                                                   | S-39 |

**Scheme 1:** Synthetic scheme for the synthesis 6-Bromo and chloro-2-cyclopropyl-3-(pyridyl-3-ylmethyl) quinazolin-4(3*H*)-ones (**3a & 3b**)

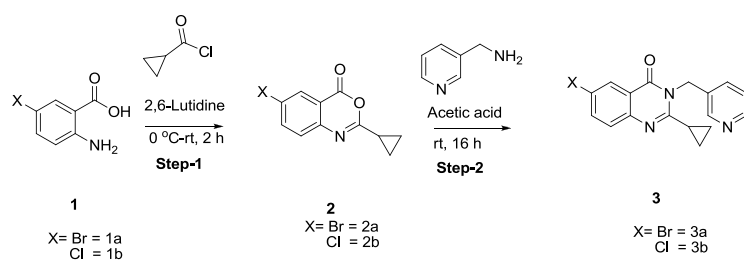

**Preparation of 6-bromo-2-cyclopropyl-4H-benzo[d][1,3]oxazin-4-one (2a):**

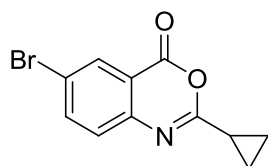

A solution of cyclopropane carbonyl chloride (1 g, 4.62mmol) was added to a stirred solution of 2-amino-5-bromobenzoic acid (1 g, 4.62 mmol) in 2, 6-Lutidine (10 V) at 0 °C for 30 min, reaction mixture was allowed to rt and maintained 2h. Reaction mixture was poured in to ice cold water and filtered the solid, washed with water. Crude compound was used for next step without any further purification. Yield (60%, 0.73 g). <sup>1</sup>H NMR (300 MHz, CDCl<sub>3</sub>): δ = 8.27 (d, *J* = 2.1 Hz, 1H), 7.83 (dd, *J* = 8.2, 2.4 Hz, 1 H), 7.37 (d, *J* = 9.0 Hz, 1 H), 1.97-1.90 (m, 1H), 1.32-1.26 (m, 2H), 1.15-1.08 (m, 2H). <sup>13</sup>C NMR (75 MHz CDCl<sub>3</sub>): δ = 164.6, 158.3, 145.7, 139.4, 130.7, 127.7, 120.3, 118.0, 14.3, 9.6.

**Preparation of 6-chloro-2-cyclopropyl-4H-benzo[d][1,3]oxazin-4-one (2b):**

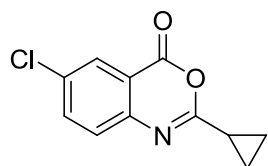

A solution of cyclopropane carbonyl chloride (1 g, 4.62mmol) was added to a stirred solution of 2-amino-5-chlorobenzoic acid (1 g, 4.62 mmol) in 2, 6-lutidine (10 V) at 0 °C for 30 min. Reaction mixture was allowed to rt and maintained for 2h. Reaction mixture was poured in to ice

cold water and filtered the solid, washed with water. Crude compound was used for next step without any further purification. Yield (60%, 0.73 g).  $^1\text{H}$  NMR (300 MHz,  $\text{CDCl}_3$ ):  $\delta$  = 8.11 (d,  $J$  = 2.0 Hz, 1H), 7.70 (dd,  $J$  = 8.4, 2.8 Hz, 1H), 7.45 (d,  $J$  = 9.0 Hz, 1H), 1.98-1.92 (m, 1H), 1.30-1.24 (m, 2H), 1.14 -1.11 (m, 2H).  $^{13}\text{C}$  NMR (75 MHz  $\text{CDCl}_3$ ):  $\delta$  = 164.5, 158.4, 145.3, 136.6, 132.8, 127.6, 117.7, 14.3, 9.6.

#### Preparation of 6-bromo-2-cyclopropyl-3-(pyridin-3-ylmethyl) quinazolin-4(3H)-one (**3a**):

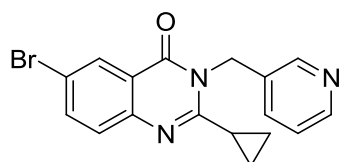

Pyridin-3-ylmethanamine (0.6 g, 5.63 mmol) was added to a solution of 6-bromo-2-cyclopropyl-3-(pyridin-3-ylmethyl) quinazolin-4(3H)-one (1g, 3.75 mmol) in acetic acid (20 V), reaction mixture was heated to reflux for 2 h. After completion of the reaction, reaction mixture was cooled to rt, the mixture was poured in to ice cold water and filter the solid. The resulting solid was applied to a silica gel column, packed in 20% EtOAc in *n*-hexane. Sequential elution with 20% EtOAc in *n*-hexane and 50% EtOAc in *n*-hexane gave 6-bromo-2-cyclopropyl-3-(pyridin-3-ylmethyl)quinazolin-4(3H)-one (**3a**) as a white solid. Yield (1.07 g, 80%).  $^1\text{H}$  NMR (300 MHz,  $\text{DMSO-d}_6$ ):  $\delta$  = 8.58 (s, 1 H), 8.49 (d,  $J$  = 4.8 Hz, 1 H), 8.20 (d,  $J$  = 1.6 Hz, 1 H), 7.93 (dd,  $J$  = 2.4, 2.4 Hz, 1 H), 7.64 (d,  $J$  = 8.0 Hz), 7.50 (d,  $J$  = 8.8 Hz, 1 H), 7.39-7.34 (m, 1 H), 5.58 (s, 2 H), 2.19-2.13 (m, 1 H), 1.10-1.06 (m, 2 H), 0.97-0.92 (m, 2 H).  $^{13}\text{C}$  NMR (75 MHz,  $\text{CDCl}_3$ ):  $\delta$  = 160.5, 158.7, 148.5, 148.2, 146.0, 137.2, 134.4, 132.2, 129.0, 128.4, 123.6, 121.3, 118.2, 44.0, 13.9, 9.4.

#### Preparation of 6-chloro-2-cyclopropyl-3-(pyridin-3-ylmethyl) quinazolin-4(3H)-one (**3b**):

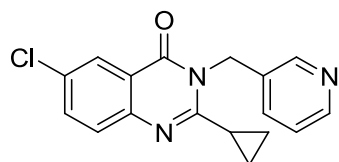

Pyridin-3-ylmethanamine (0.6 g, 5.63 mmol) was added to a solution of 6-chloro-2-cyclopropyl-3-(pyridin-3-ylmethyl) quinazolin-4(3H)-one (1g, 3.75 mmol) in acetic acid (20 V), reaction mixture was heated to reflux for 2 h. After completion of the reaction, reaction mixture was

cooled to rt. The mixtures was poured in to ice cold water and filter the solid. The resulting solid was applied to a silica gel column packed in 20% EtOAc in n-hexane. Sequential elution with 20% EtOAc in n-hexane and 50% EtOAc in n-hexane gave 1.1 g of 6-bromo-2-cyclopropyl-3-(pyridin-3-ylmethyl)quinazolin-4(3*H*)-one as a white solid. Yield (1.07 g, 80%). <sup>1</sup>H NMR (400MHz, DMSO-*d*<sub>6</sub>):  $\delta$  = 8.58 (s, 1H), 8.50 (d, *J* = 3.6 Hz, 1 H), 8.06 (s, 1H), 7.82 (d, *J* =, 8.8 Hz, 1 H), 7.66 (d, *J* = 8.0 Hz 1 H), 7.58 (d, *J* = 8.8 Hz, 1 H), 7.37 (dd, *J* = 7.2, 4.8 Hz, 1H), 5.58 (s, 2H), 2.18-2.16 (m, 1H), 1.08-1.03 (m, 2H), 0.96-0.94 (m, 2H). <sup>13</sup>C NMR (75 MHz CDCl<sub>3</sub>):  $\delta$  = 160.5, 158.7, 148.5, 148.2, 146.0, 137.2, 134.4, 132.2, 129.0, 128.4, 123.6, 121.3, 118.2, 44.0, 13.9, 9.4.

### References

- [1] a) J.-F. Liu, J. Lee, A. M. Dalton, G. Bi, L. Yu, C. M. Baldino, E. McElory and M. Brown, *Tetrahedron Lett.*, 2005, 46, 1241; (b) C. Carolyn, J. D. Brackett and D. O. Bloch, *Pharmacotherapy* 2000, 20, 229; (c) P. M. Chandrika, T. Yakaiah, A. R. R. Rao, B. Narsaiah, N. C. Reddy, V. Sridhar and J. V. Rao, *Eur. J. Med. Chem.*, 2008, 43, 846; (d) P. M. Chandrika, T. Yakaiah, B. Narsaiah, V. Sridhar, G. Venugopal, J. V. Rao, K. P. Kumar, U. S. N. Murthy and A. R. R. Rao, *Indian J. Chem.*, 2009, 48, 840; (e) G. Rabilloud and B. Sillion, *J. Heterocyclic. Chem.*, 1980, 17, 1065-1068.

**Table 1** Comparison of the rate of formation of 4a in % yield with different mol% of pre-catalyst loading on 3a with  $\text{PhB}(\text{OH})_2$

|        | 1h | 2h | 3h | 4h | 8h | 16h | 24h |
|--------|----|----|----|----|----|-----|-----|
| 1mol%  | 10 | 15 | 19 | 24 | 33 | 45  | 45  |
| 2mol%  | 27 | 36 | 38 | 42 | 56 | 66  | 67  |
| 5mol%  | 69 | 76 | 80 | 81 | 84 | 87  | 88  |
| 10mol% | 93 | 95 | 96 | 97 | 97 | 96  | 96  |
| 20mol% | 94 | 96 | 98 | 98 | 98 | 99  | 98  |
| 30mol% | 94 | 94 | 94 | 95 | 97 | 96  | 95  |

**Fig. 1** Comparison of the rate of formation of 4a with different mol% of pre-catalyst loading on 3a with  $\text{PhB}(\text{OH})_2$  at 80 °C (formation of 4a in percentages, determined by LCMS).  $\text{K}_3\text{PO}_4$  as base and 1,4-dioxane as solvent.

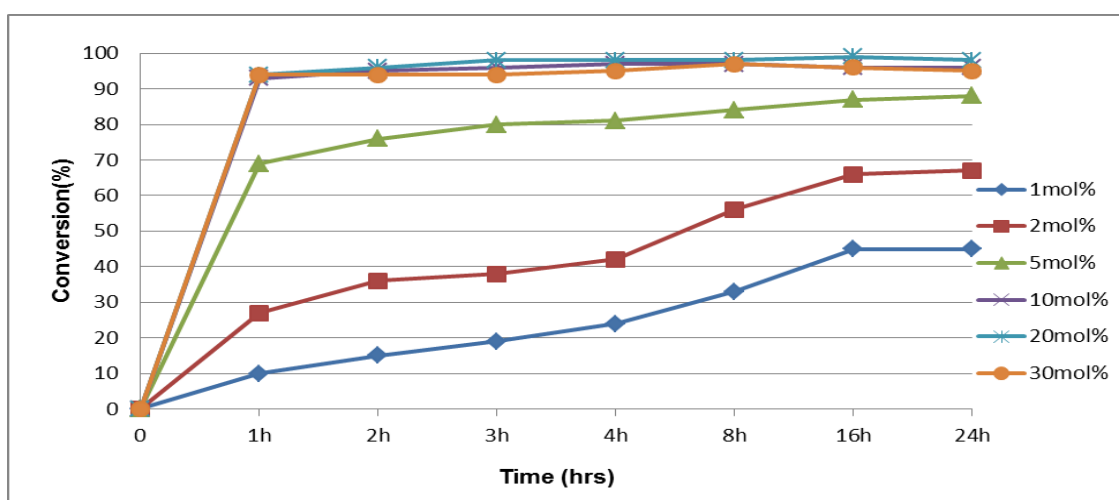







**Fig 4.** Screen shot of Calculations of IC50 values in Excel sheet and Screen shot of AGH 96 well plate

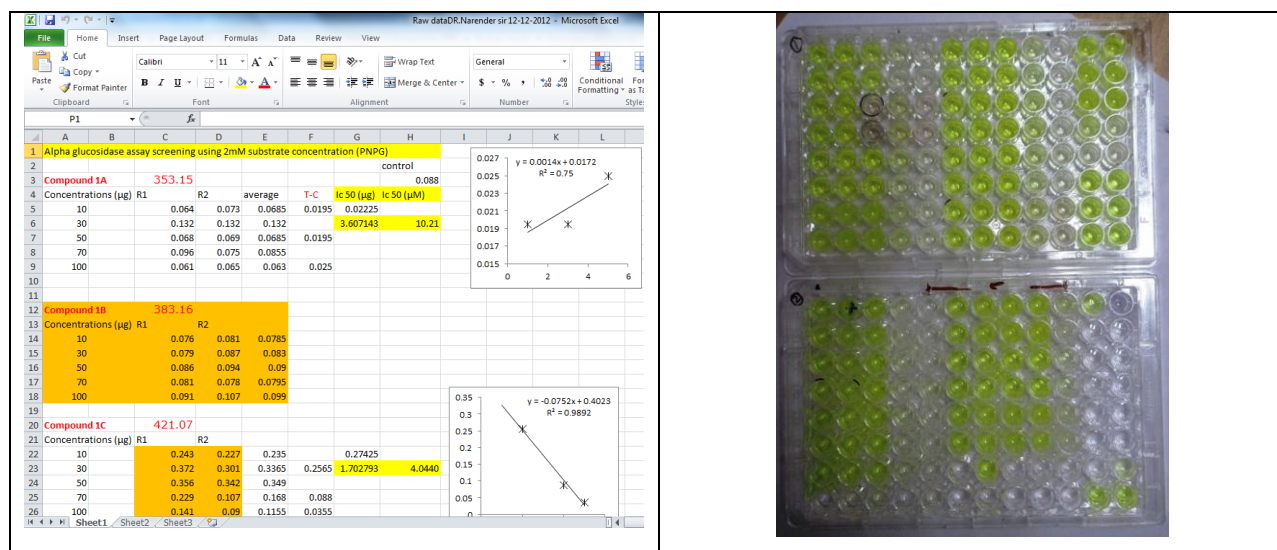

**Table 2.** Physicochemical properties, Lipinski properties, ADMET properties calculated for selected compounds

| Name | PSA   | HBA | NRB | NR | MW     | HBD | ALogP | BBB | Abs | Sol   | hERG pIC50 |
|------|-------|-----|-----|----|--------|-----|-------|-----|-----|-------|------------|
| 4q   | 58.45 | 4   | 4   | 5  | 354.40 | 0   | 2.59  | 2   | 0   | -4.27 | 4.71       |
| 4u   | 74.24 | 4   | 4   | 5  | 371.44 | 1   | 2.62  | 2   | 0   | -4.51 | 4.40       |
| 4x   | 45.56 | 3   | 5   | 4  | 333.43 | 0   | 3.88  | 1   | 0   | -5.15 | 5.26       |
| 4w   | 45.56 | 3   | 4   | 5  | 317.38 | 0   | 3.05  | 1   | 0   | -4.66 | 5.22       |
| 4y   | 45.56 | 3   | 3   | 4  | 291.35 | 0   | 2.71  | 1   | 0   | -4.24 | 4.91       |
| 4s   | 58.70 | 3   | 4   | 6  | 393.44 | 0   | 4.34  | 1   | 0   | -6.21 | 5.44       |
| 4r   | 61.35 | 3   | 4   | 6  | 392.45 | 1   | 4.04  | 1   | 0   | -6.02 | 5.10       |
| 4t   | 73.80 | 3   | 4   | 5  | 359.44 | 0   | 3.41  | 1   | 0   | -4.67 | 5.04       |
| 4a   | 45.56 | 3   | 4   | 5  | 353.42 | 0   | 3.74  | 1   | 0   | -5.27 | 5.13       |
| 4p   | 32.67 | 2   | 4   | 6  | 402.49 | 0   | 5.80  | 0   | 0   | -7.55 | 5.94       |

**Abbreviations:** PSA :Polar surface area; HBA :Num\_H\_Acceptors; NRB :Num\_RotatableBonds; NR :Num\_Rings;; MW :Molecular\_Weight; HBD :Num\_H\_Donors; ALogP :ALogP; BBB :ADMET\_BBB\_Level (0 high to 2 Medium penetration); Abs :ADMET\_Absorption\_Level (0 = Good; 1 = Moderate; 2 = Low; 3 = Very low); Sol :ADMET\_Solubility (-8 low to -2 good ), hERG pIC50 values should be around 5.

**Fig 5.** The predicted binding mode of 4f and 4o to show the pi-pi interaction with the aromatic residue of the active site

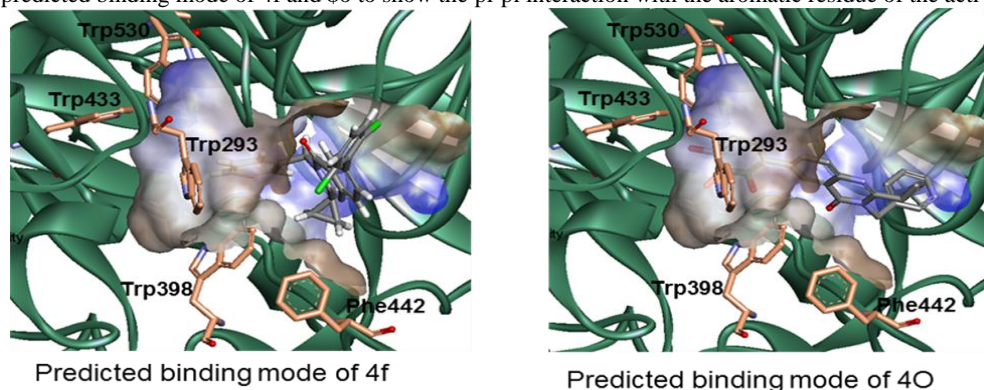

The active site of the glucosidase contains hydrophobic region surrounded by Trp530, Trp433, Trp293, Trp398, Phe442 amino acids. The binding mode of these compounds 4f, 4o also reveal that the hydrophobic groups were well tightly fixed in the hydrophobic region of the glucosidase active site.

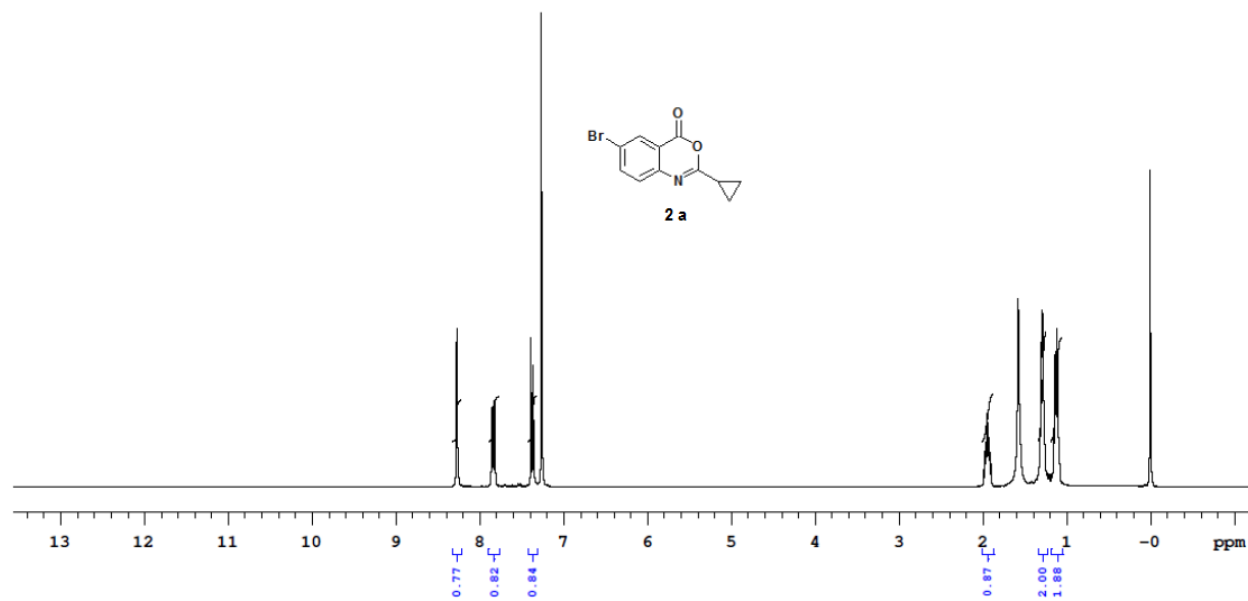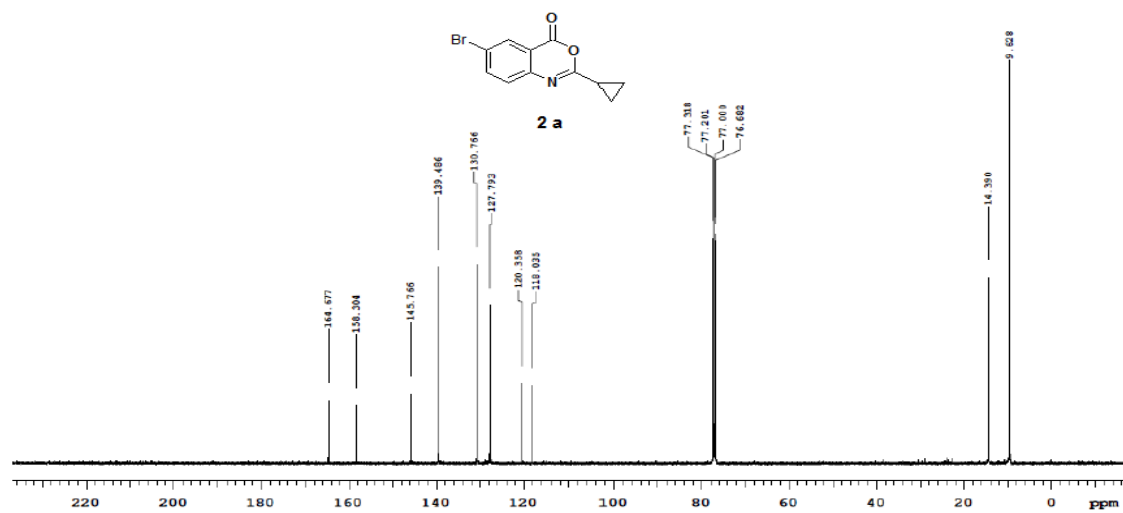

Plotname: FMR-Fbd-step-2-cy CARBON 01 plot01

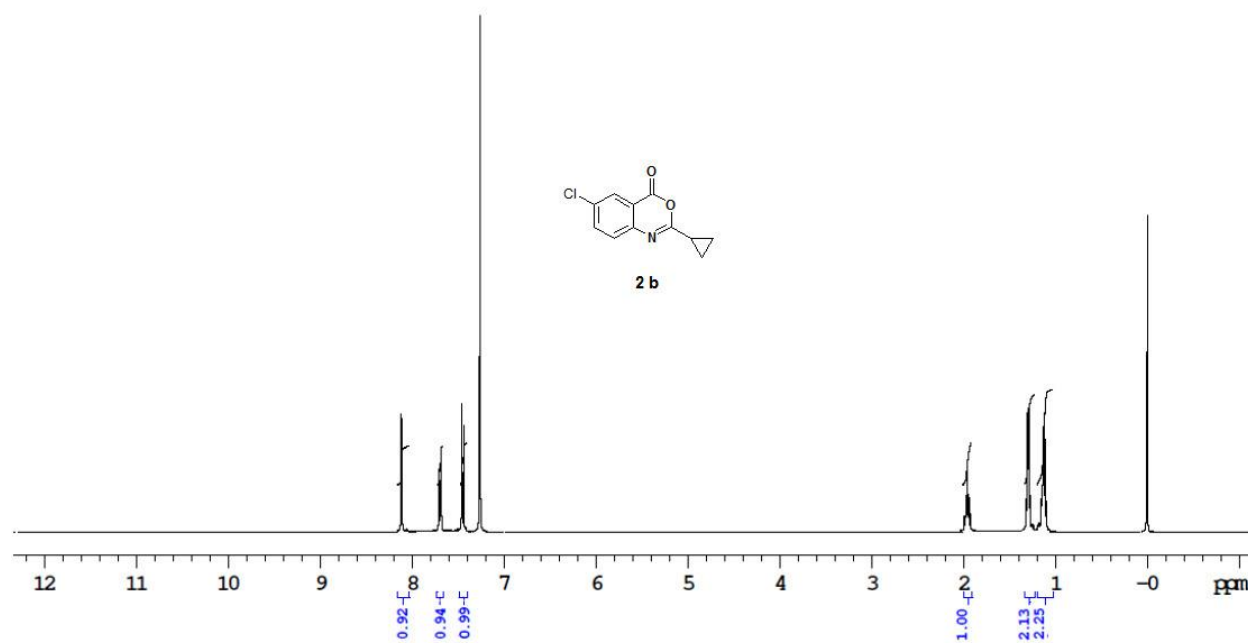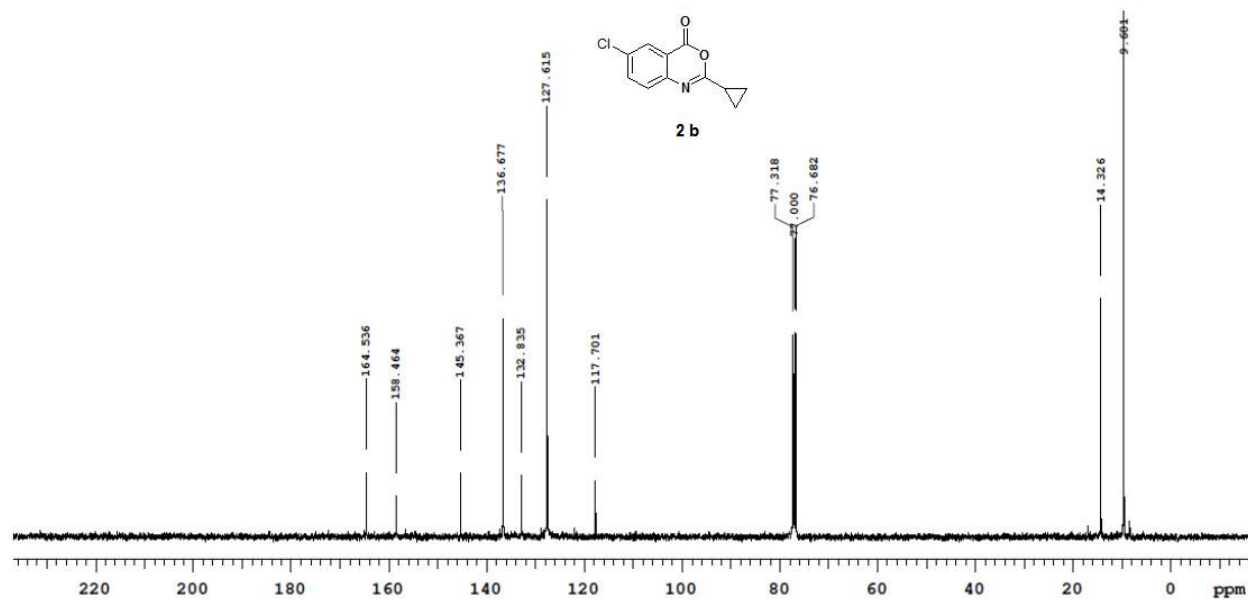

Analyst Sign:

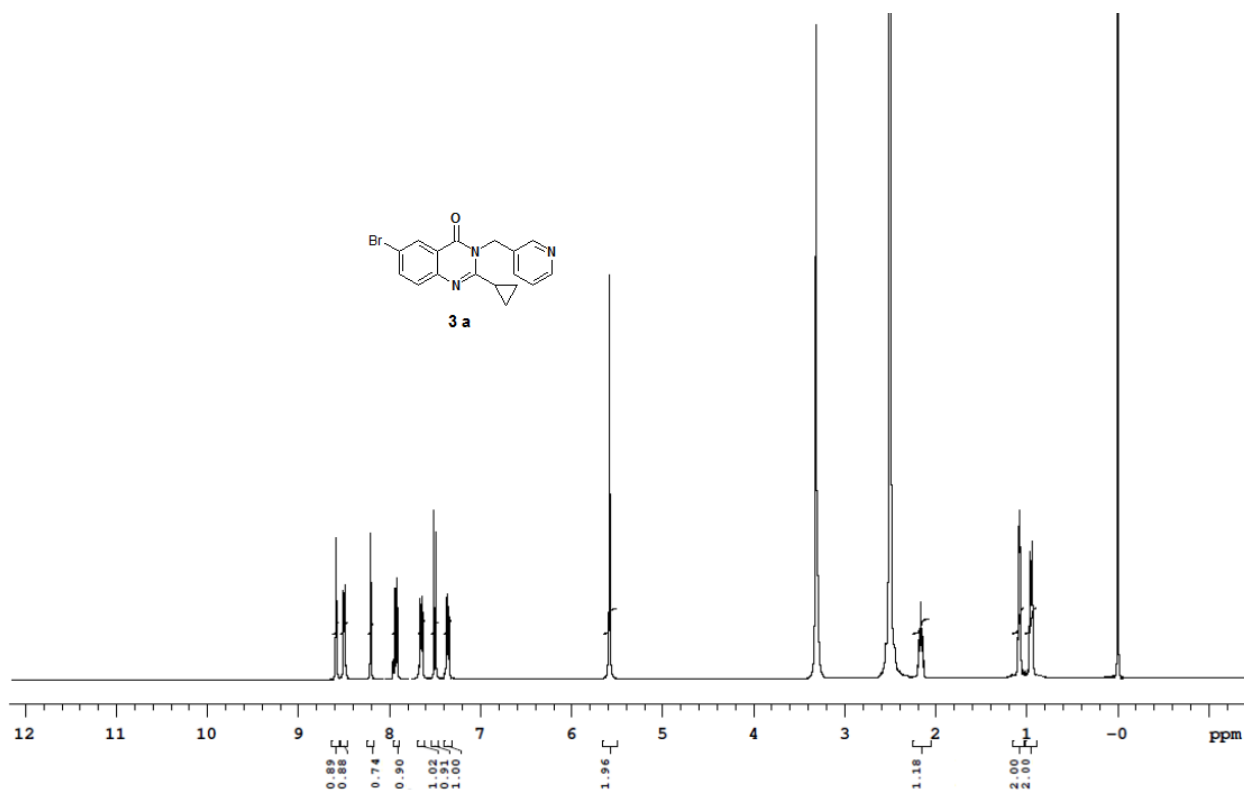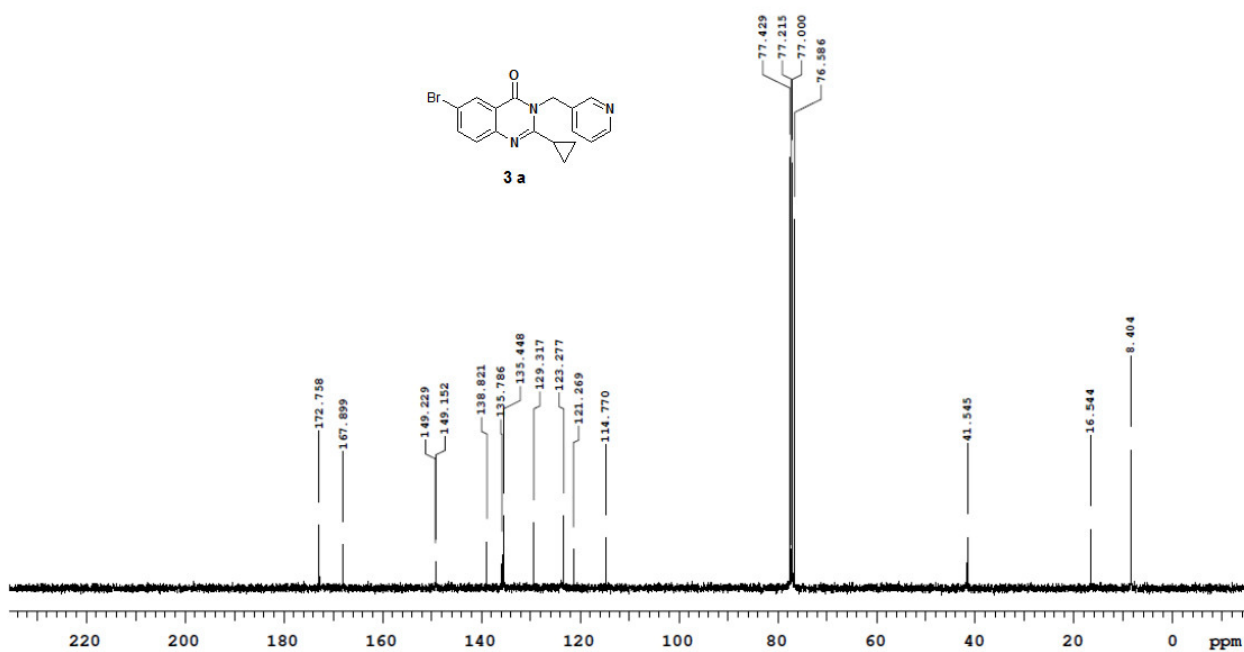

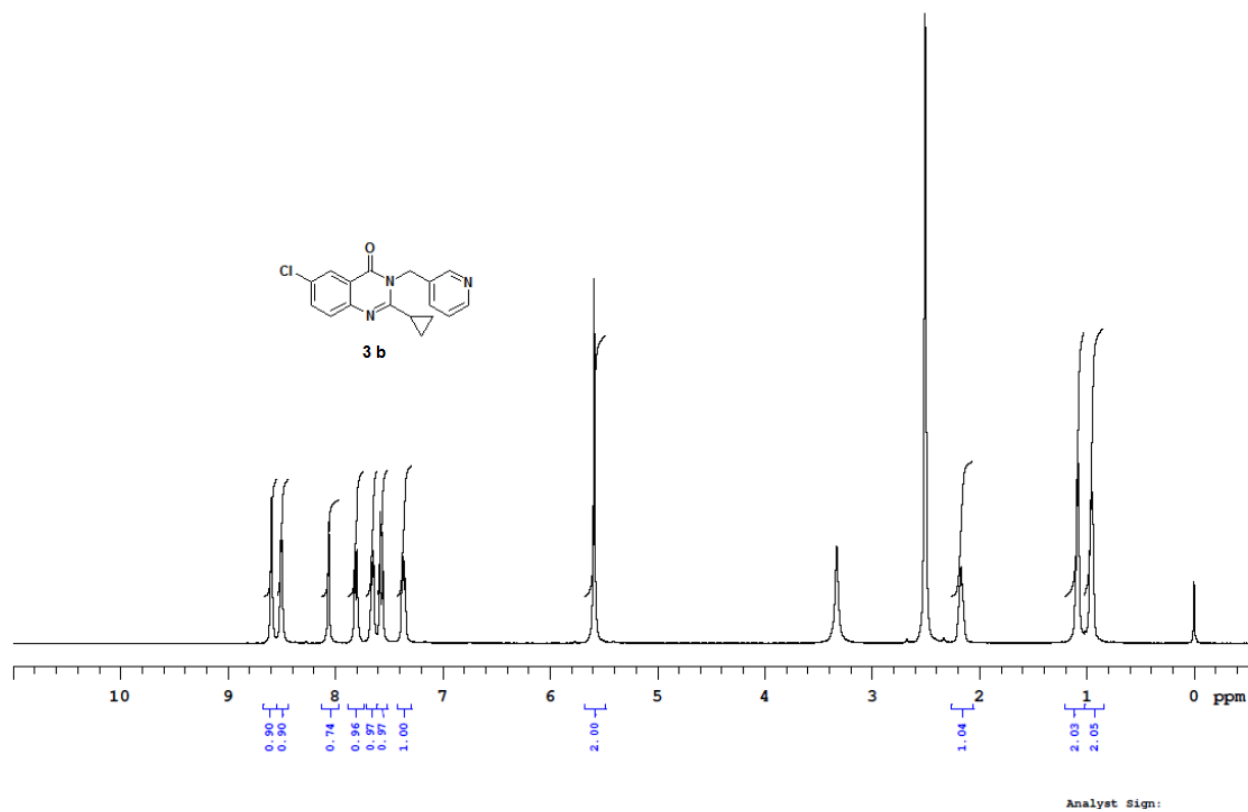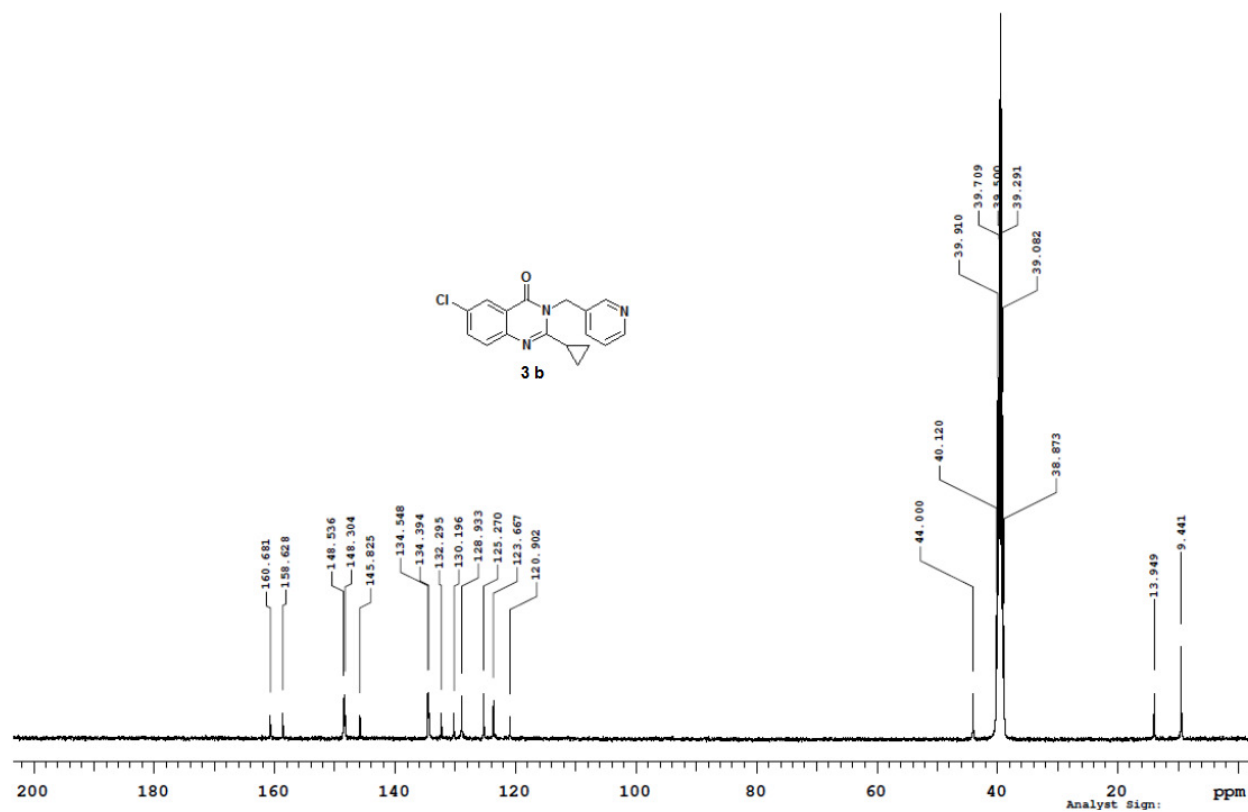

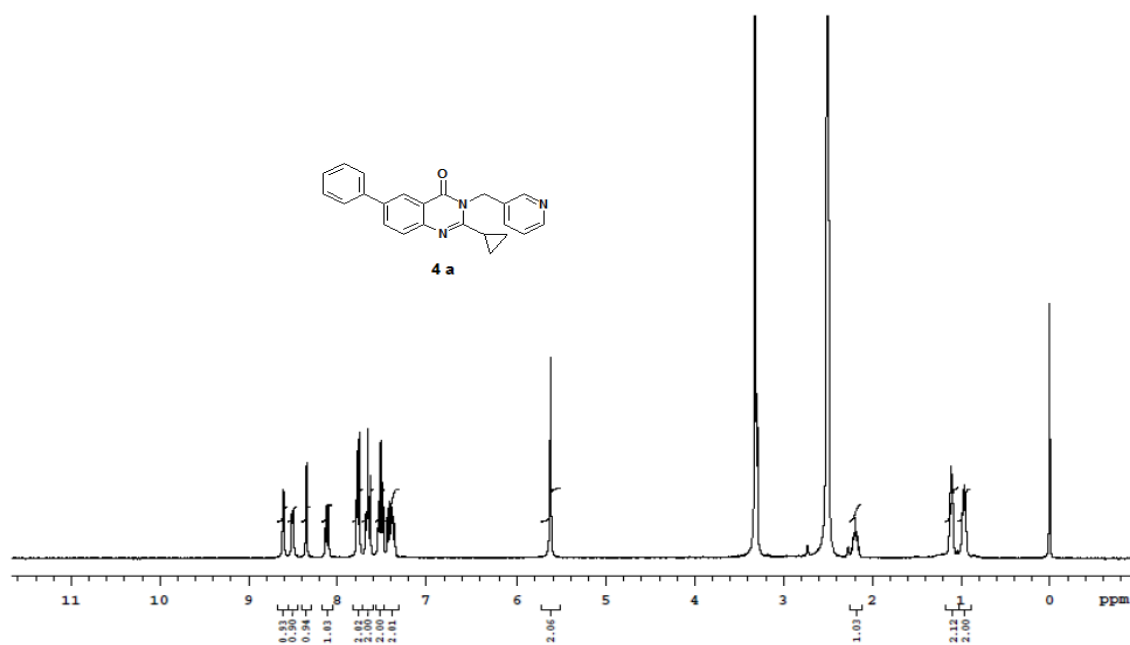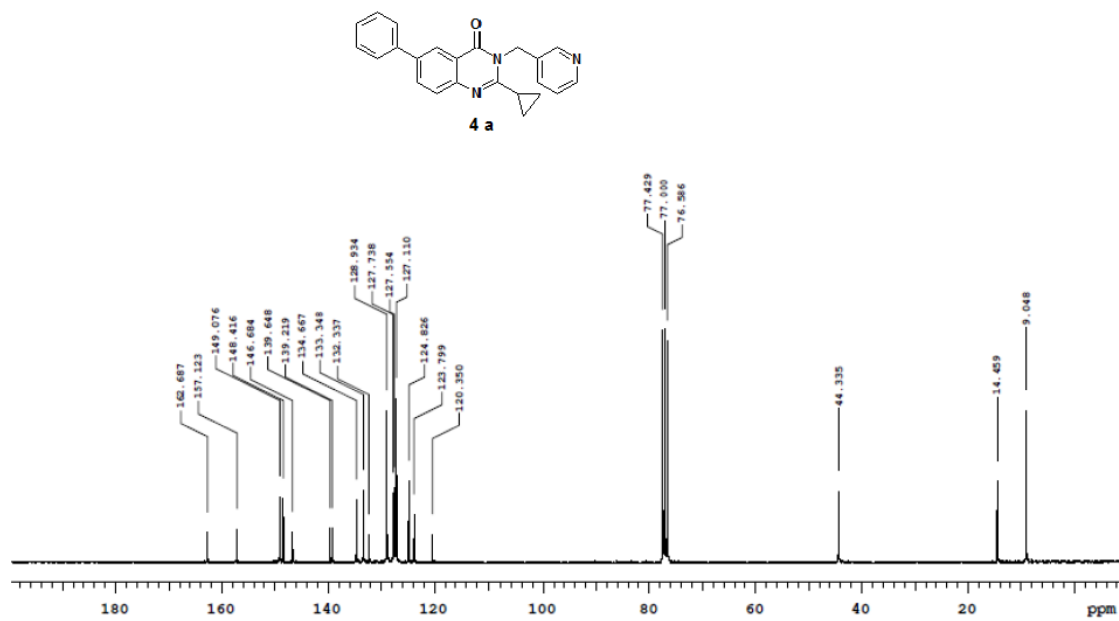

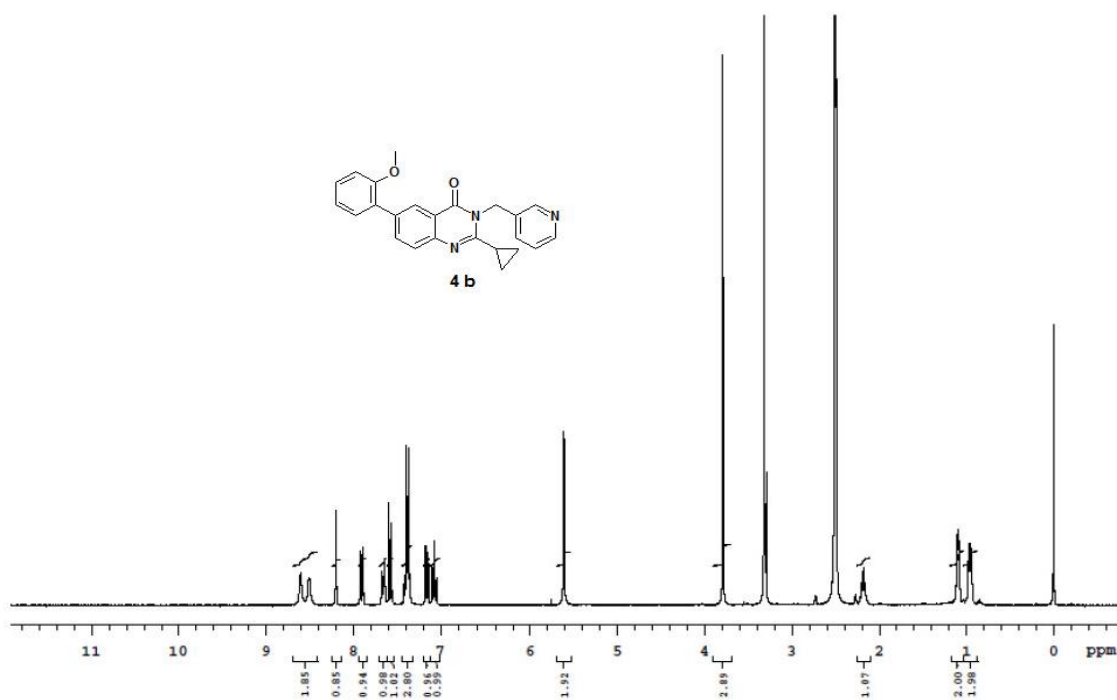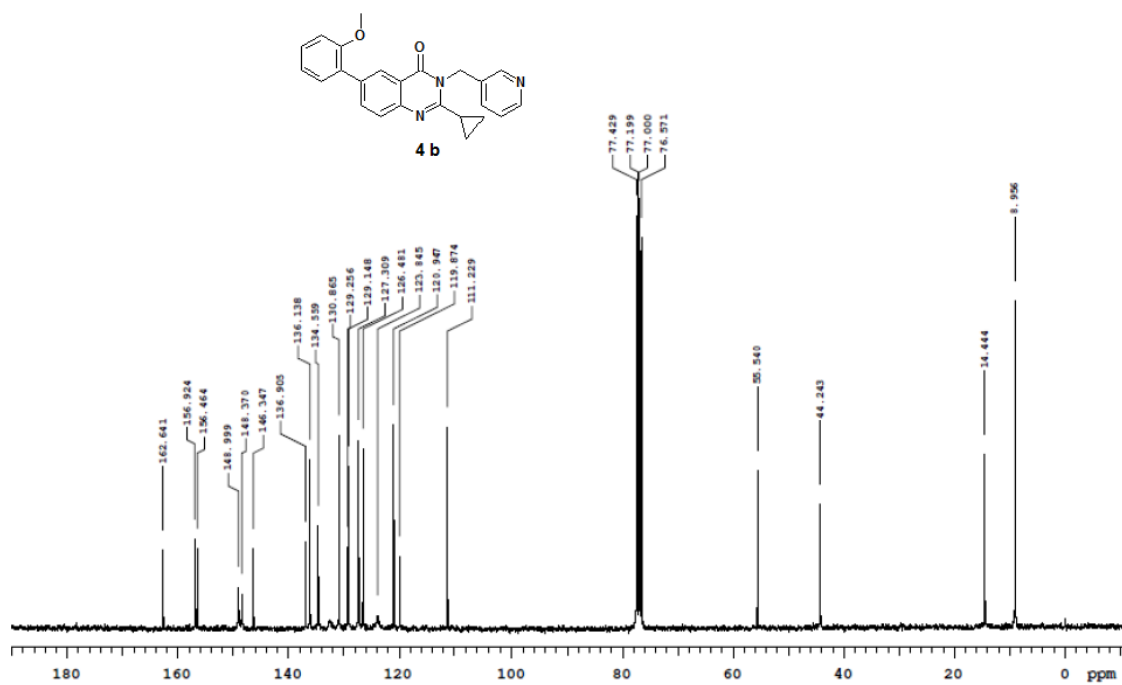

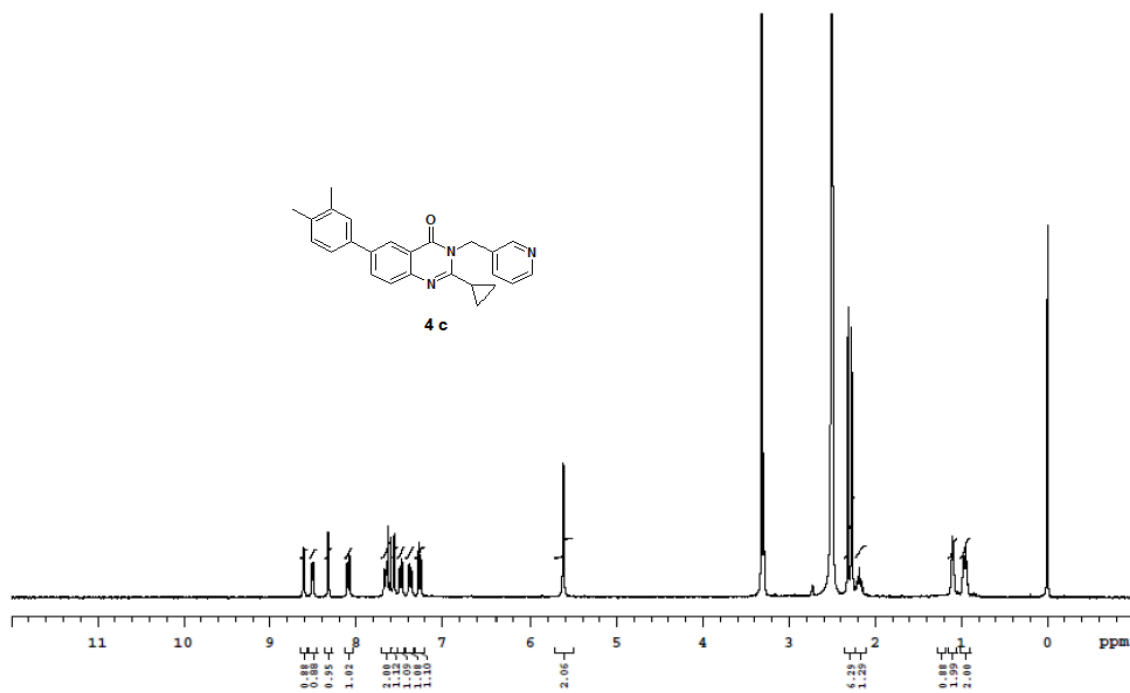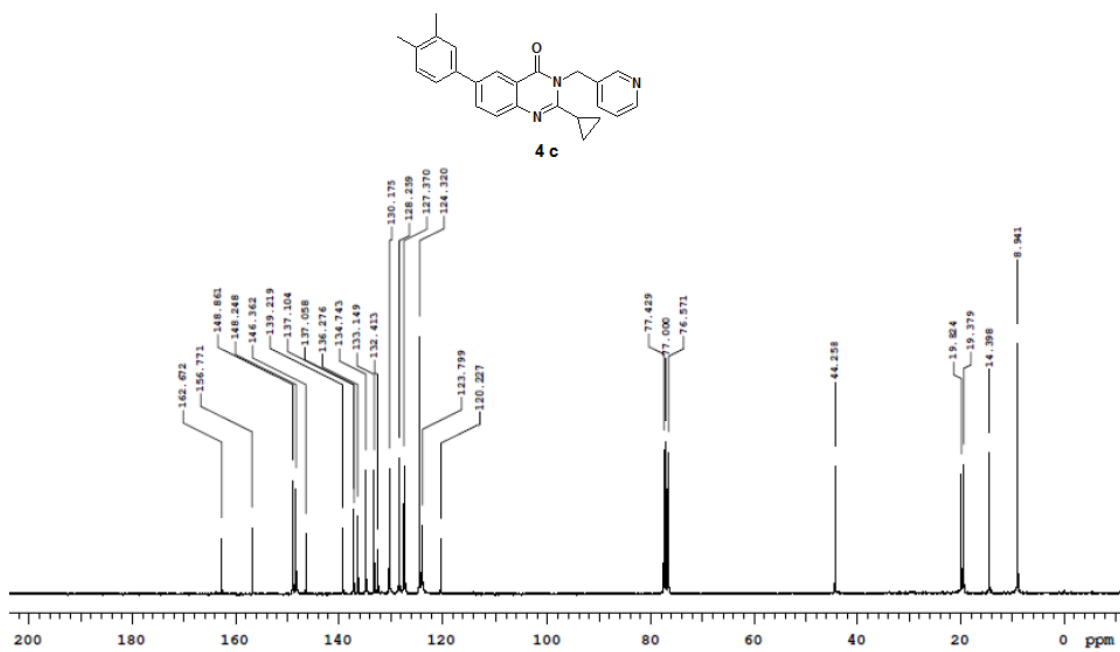



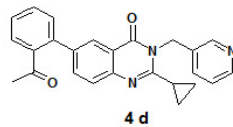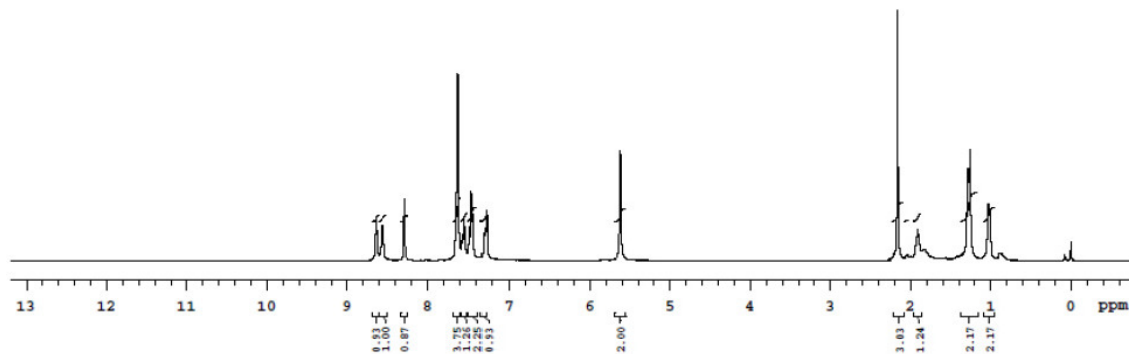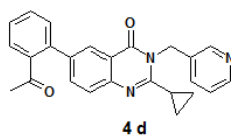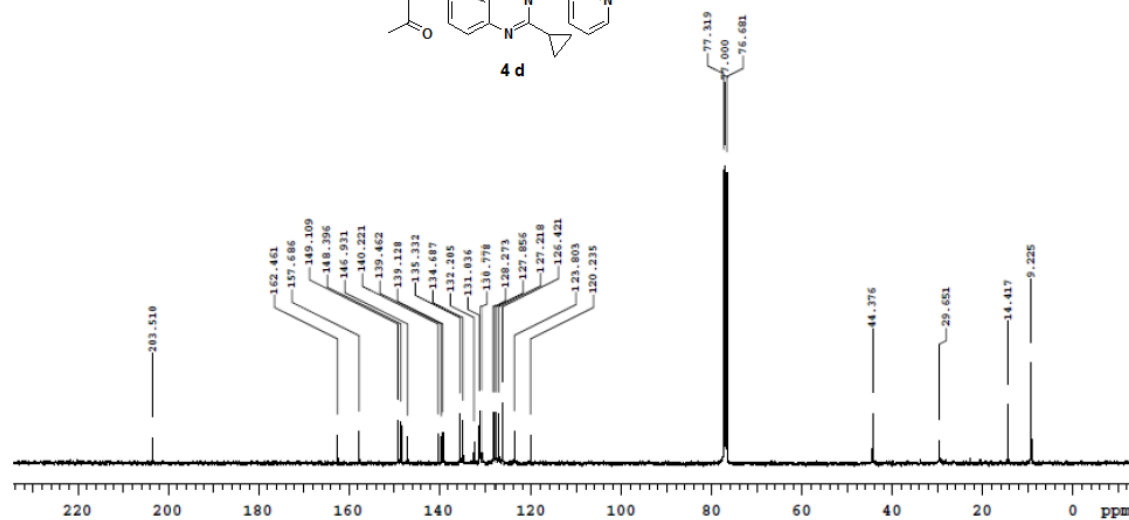

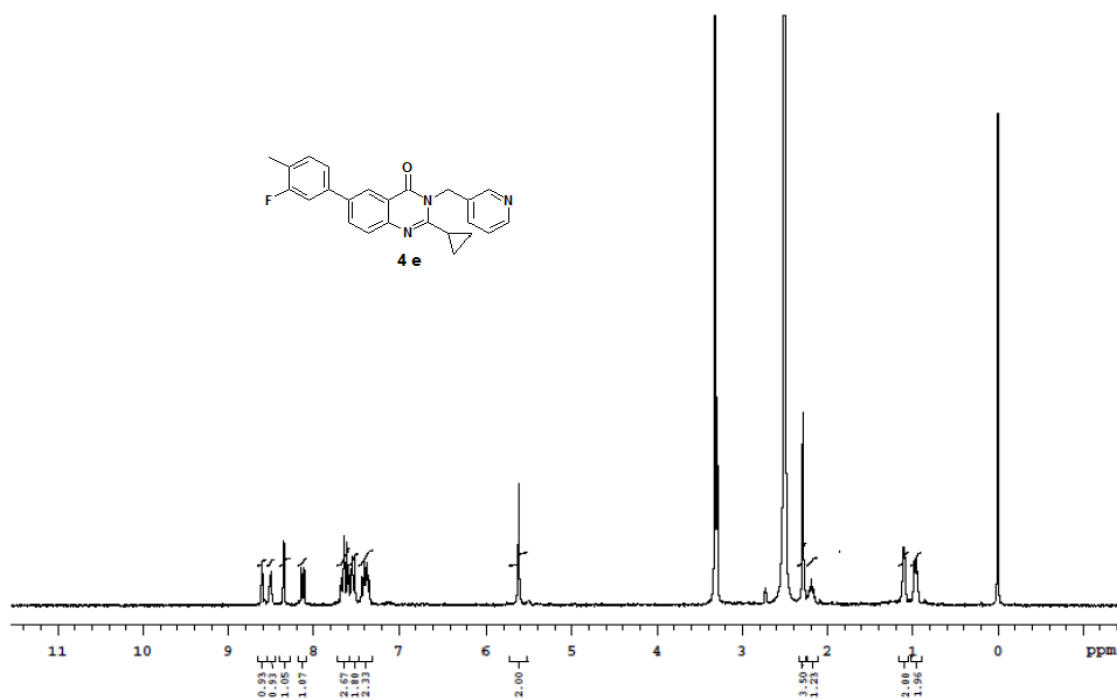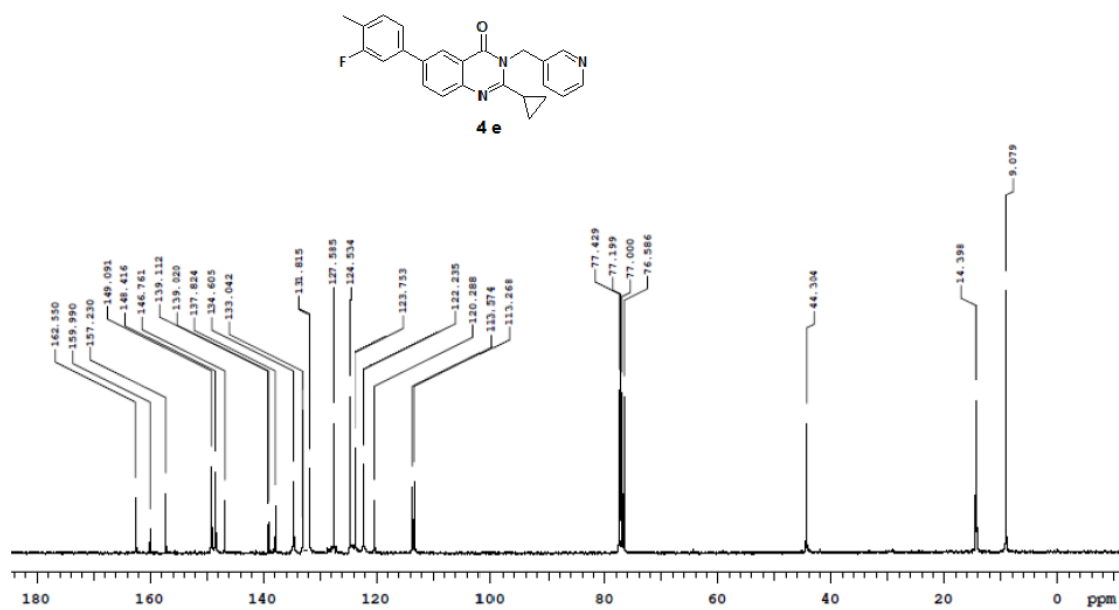

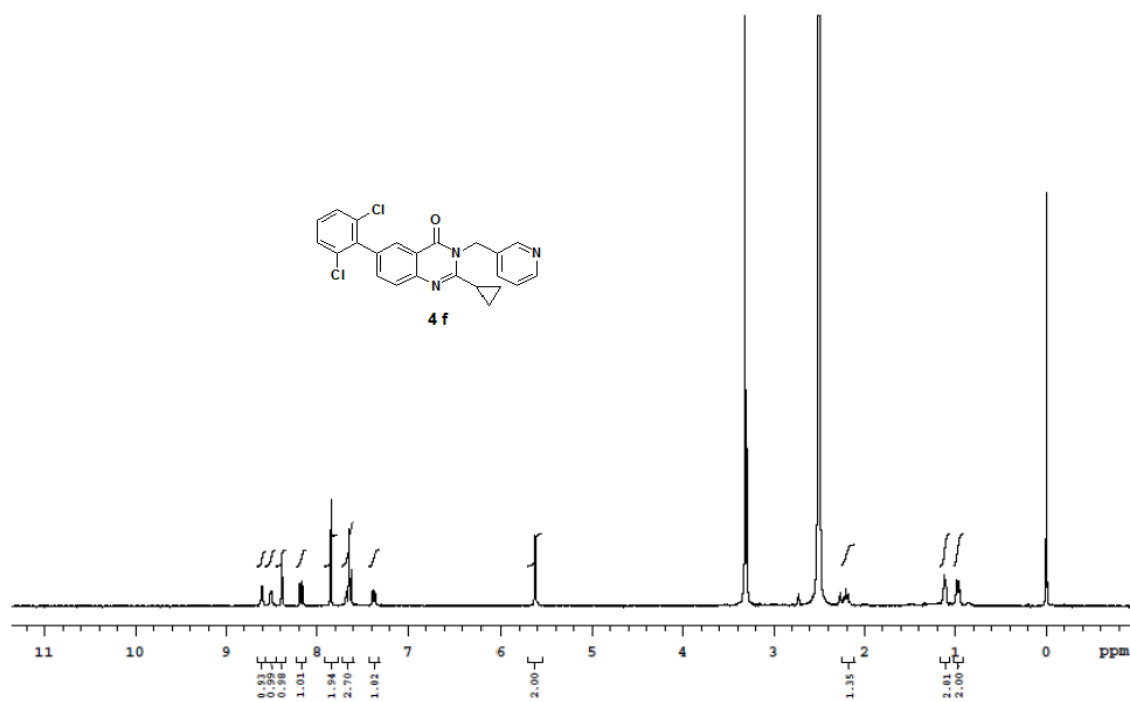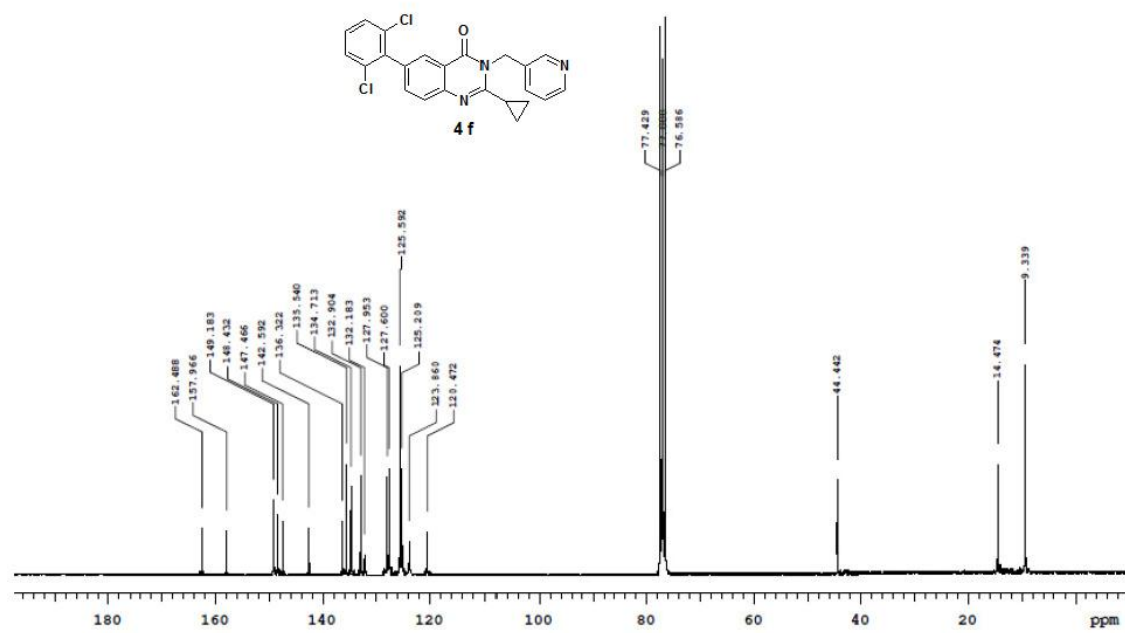

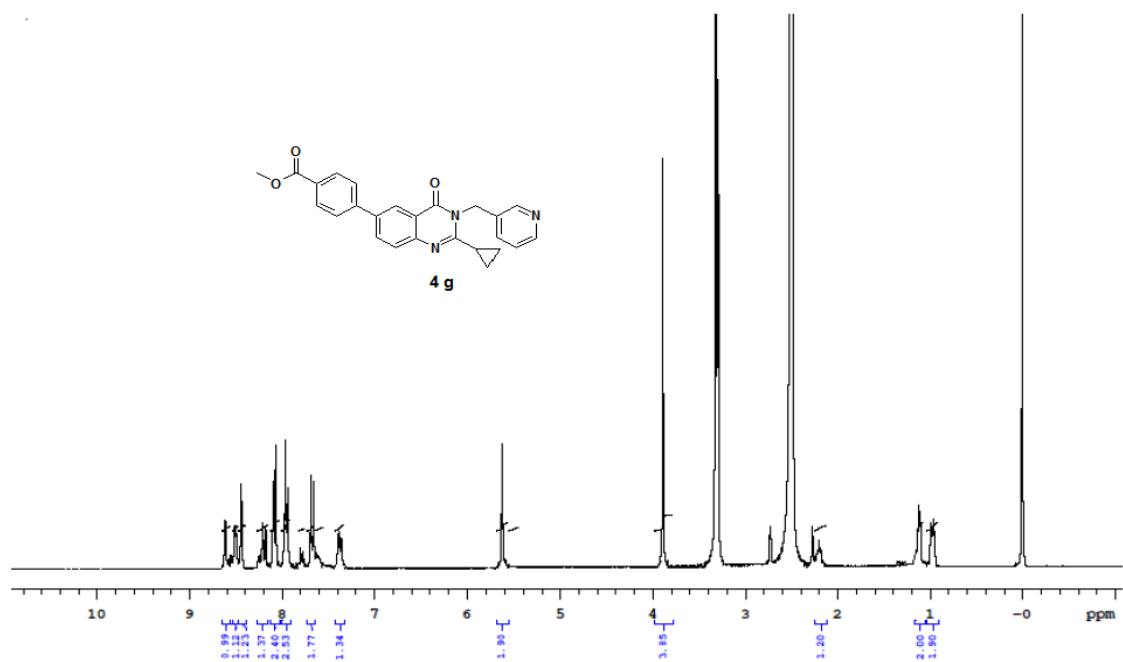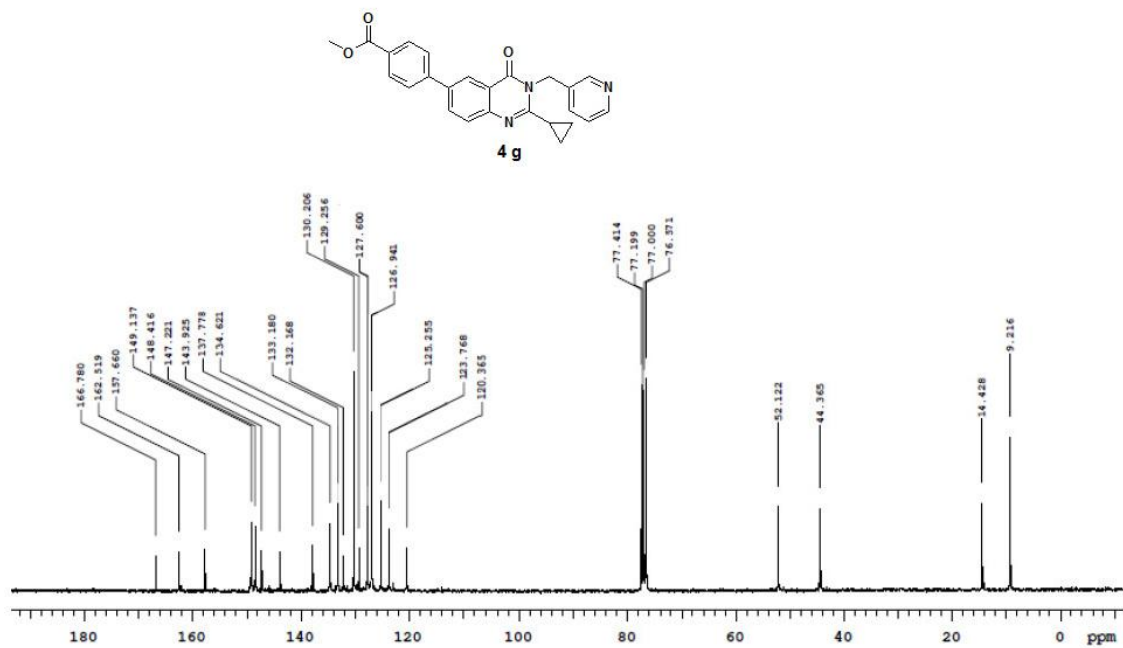

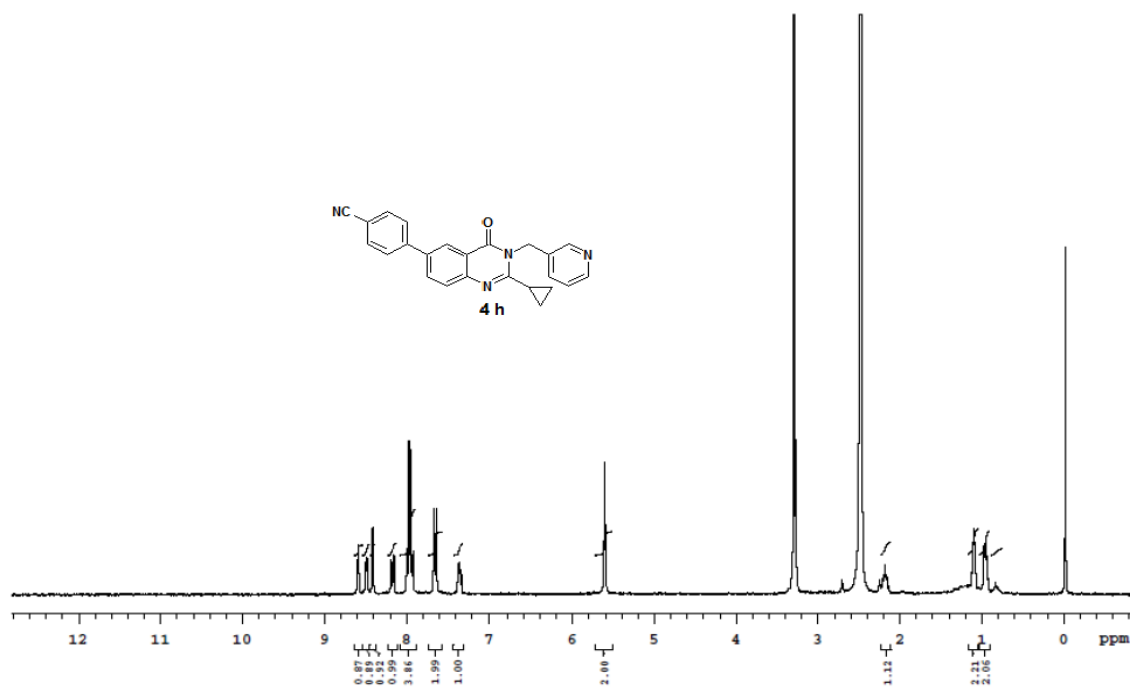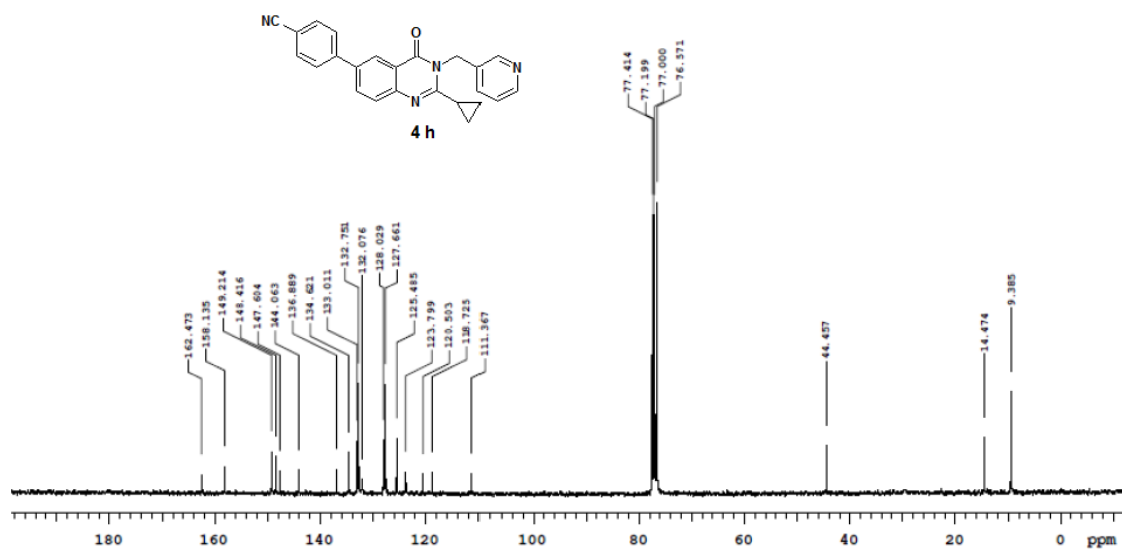

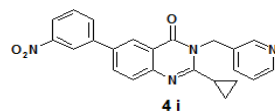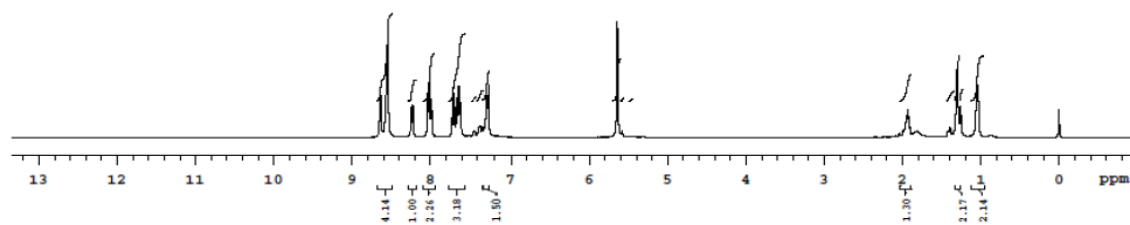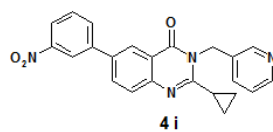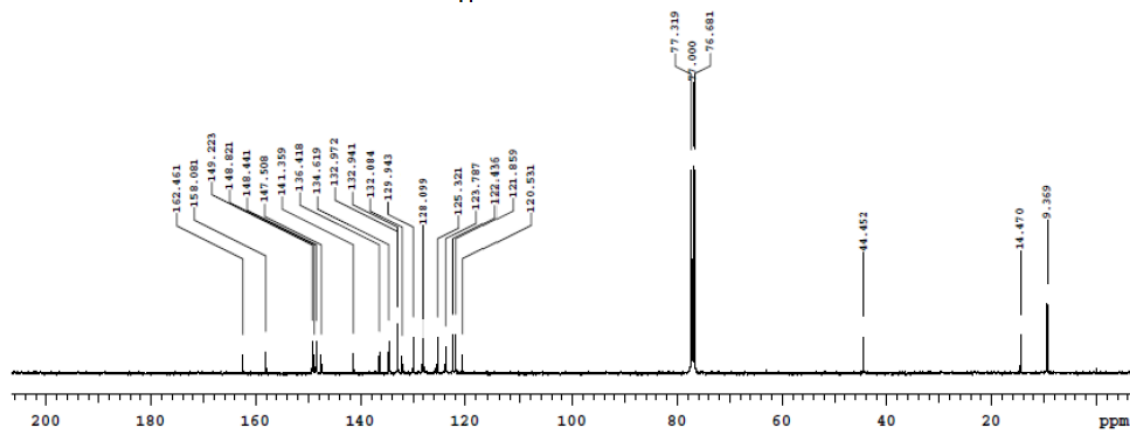

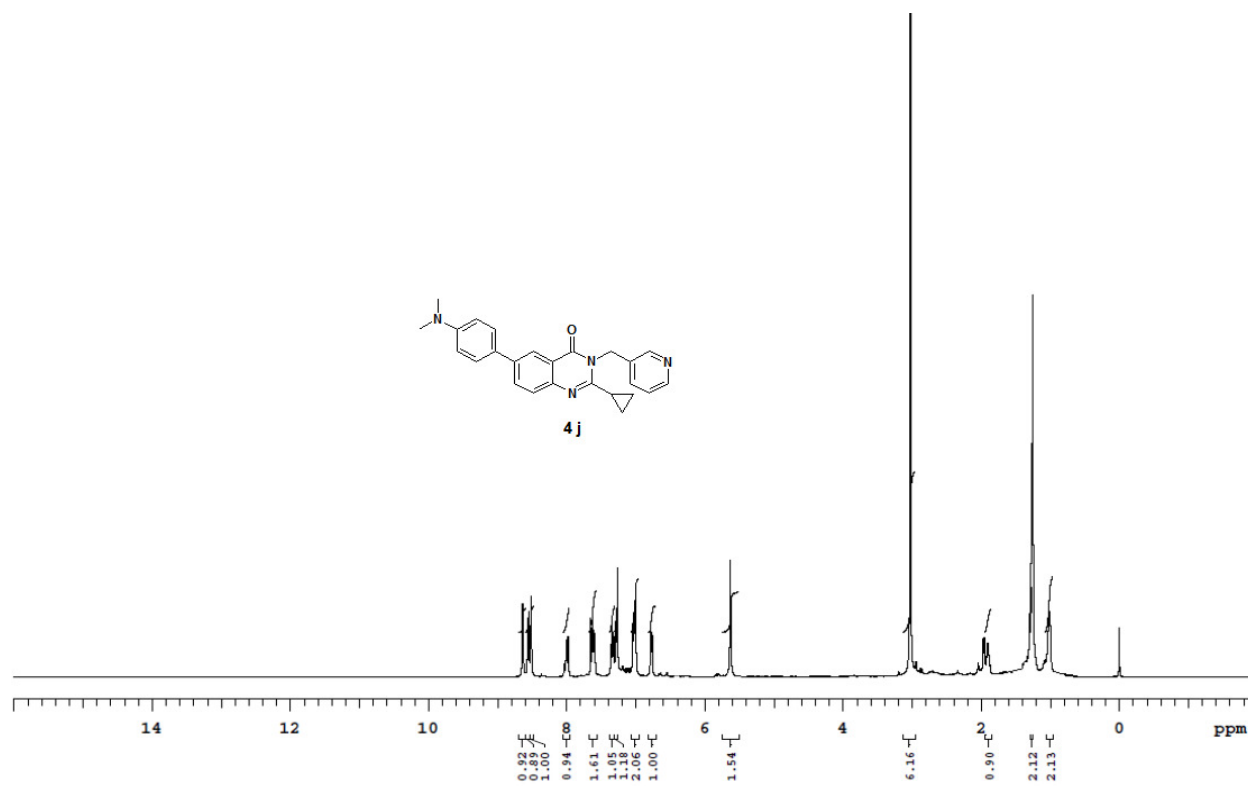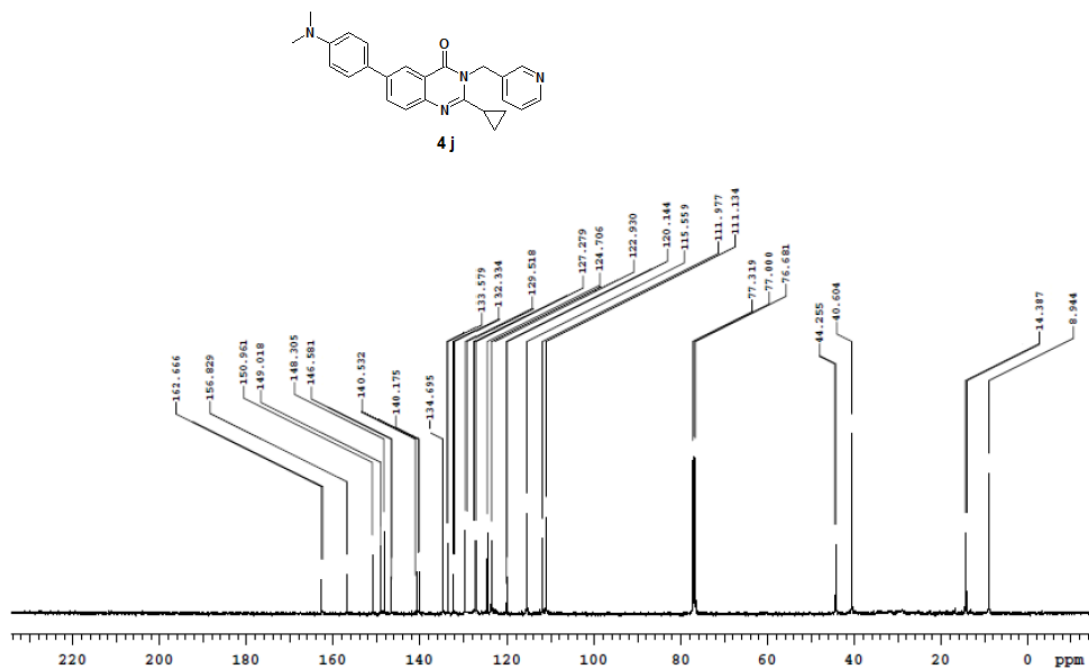

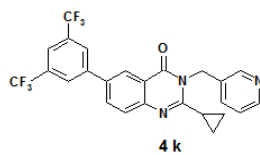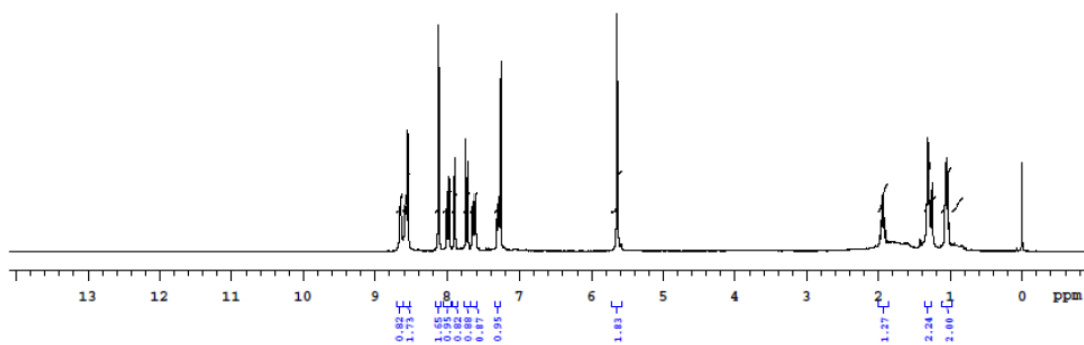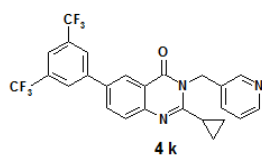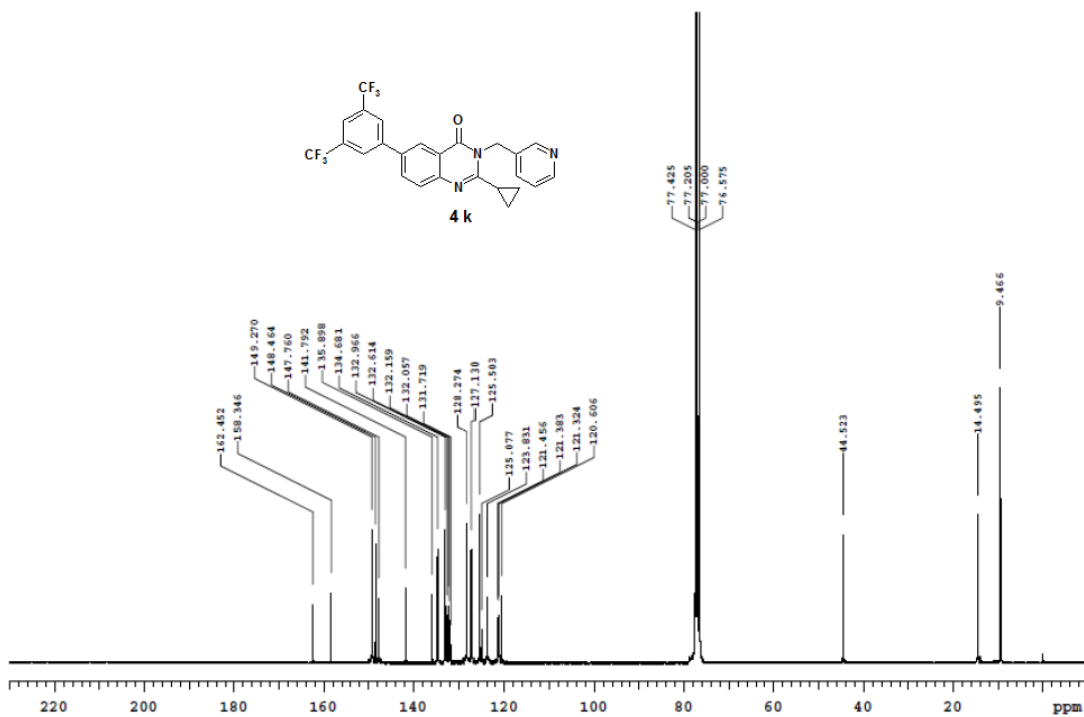



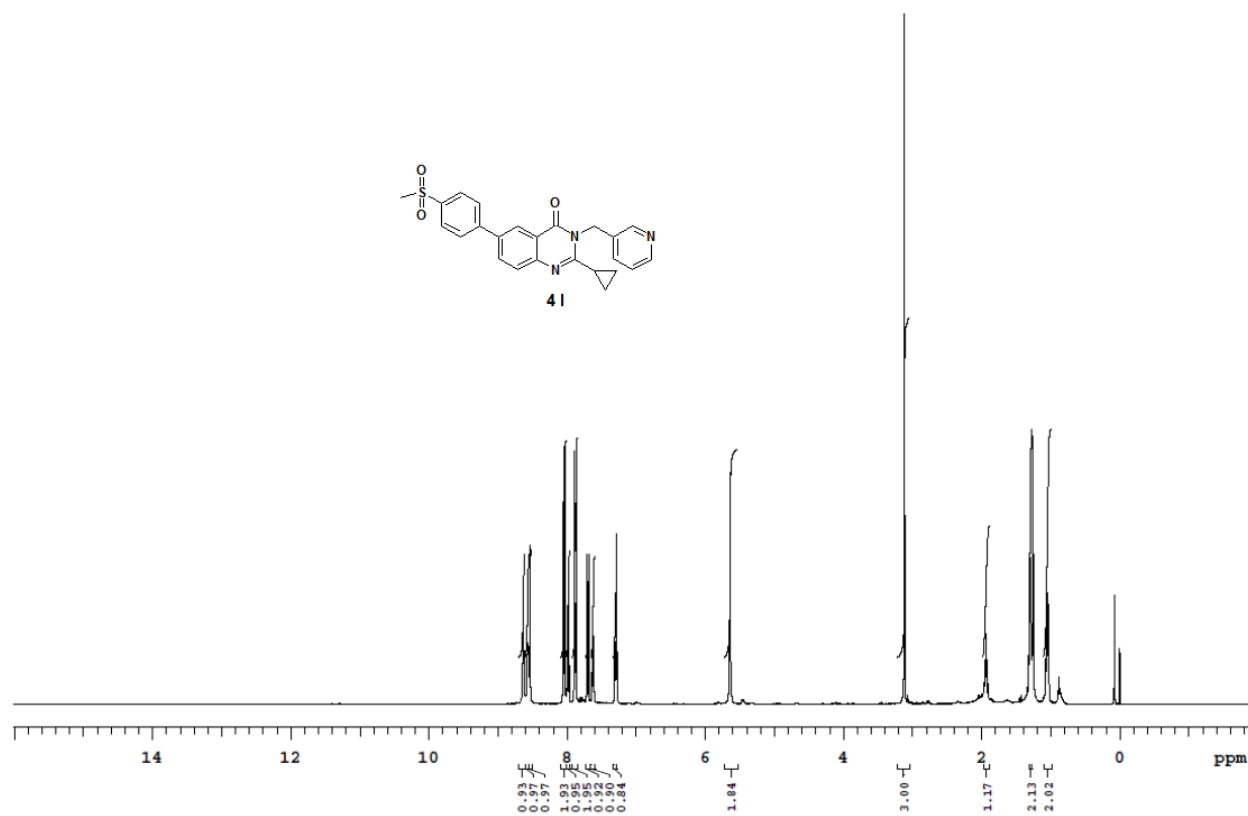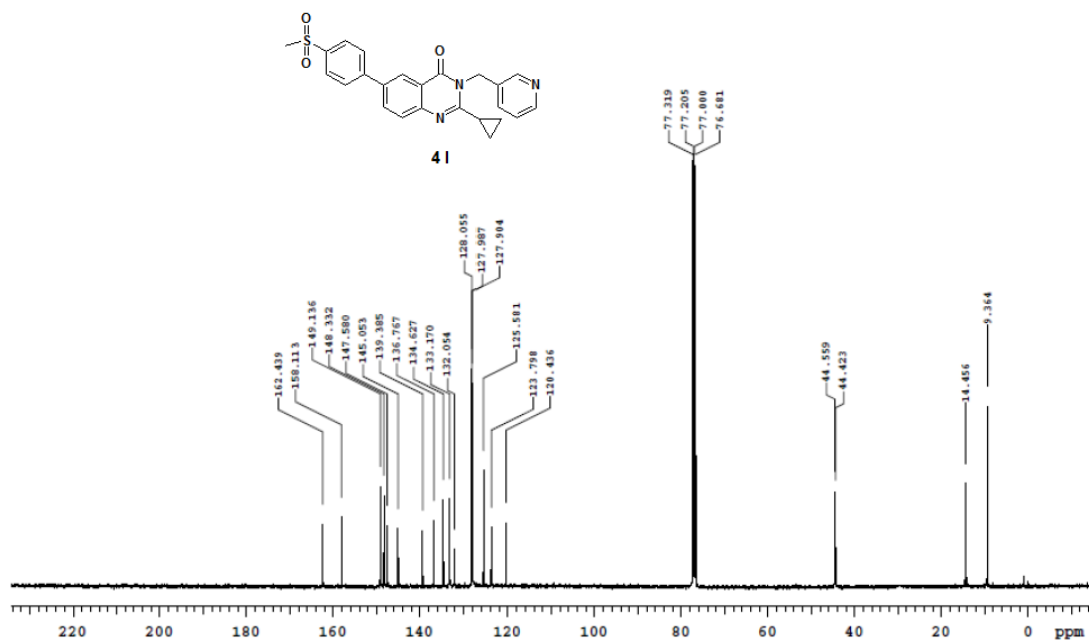

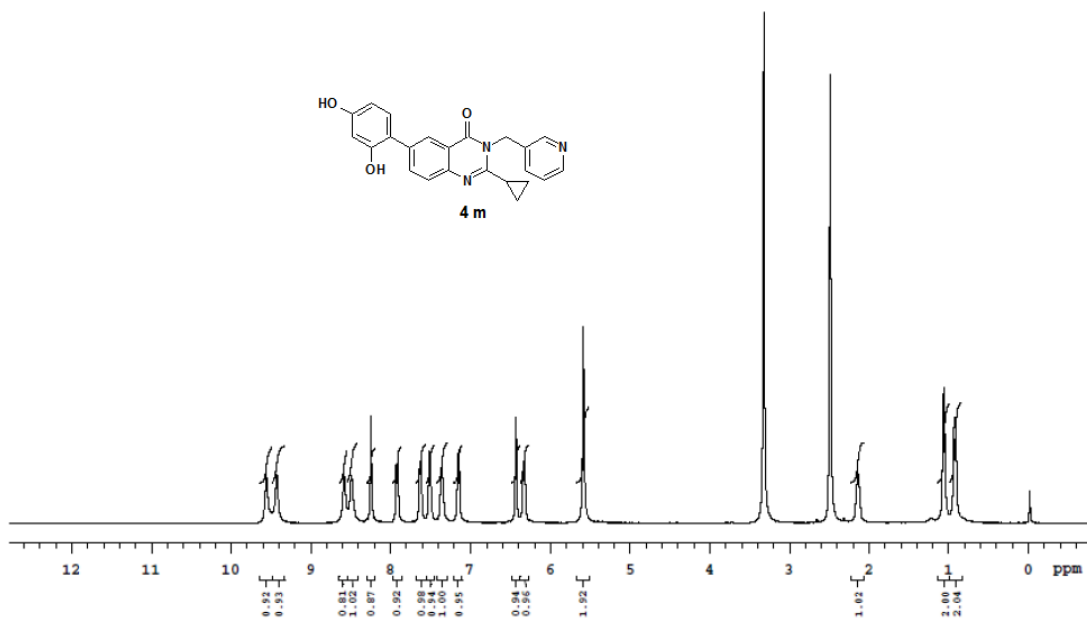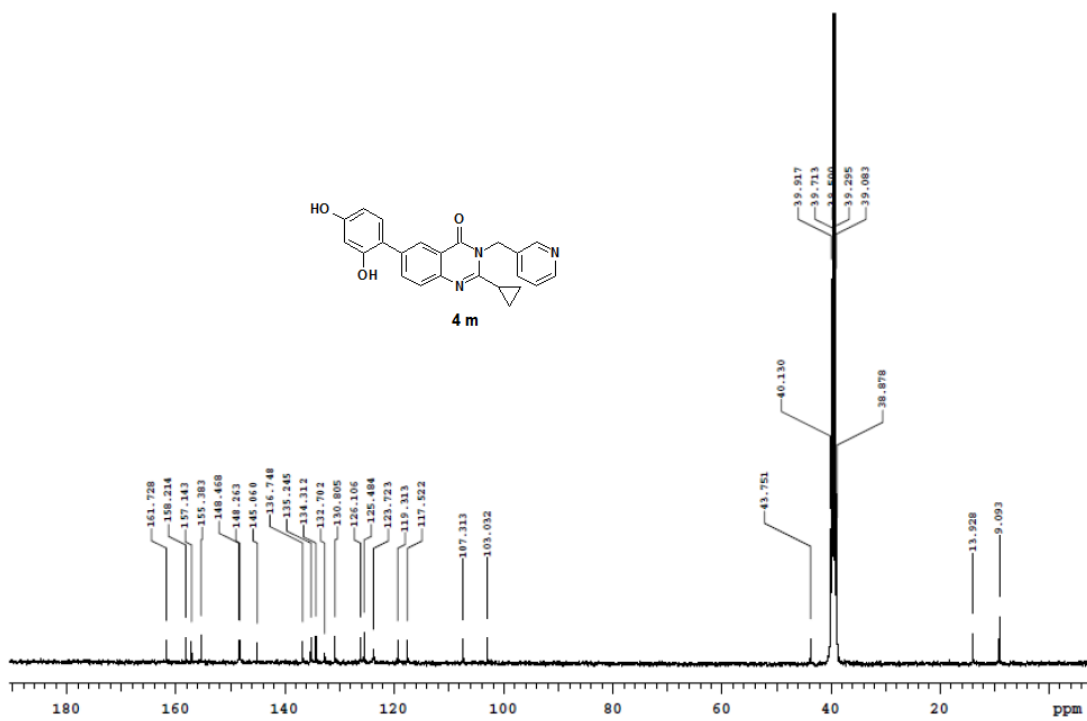

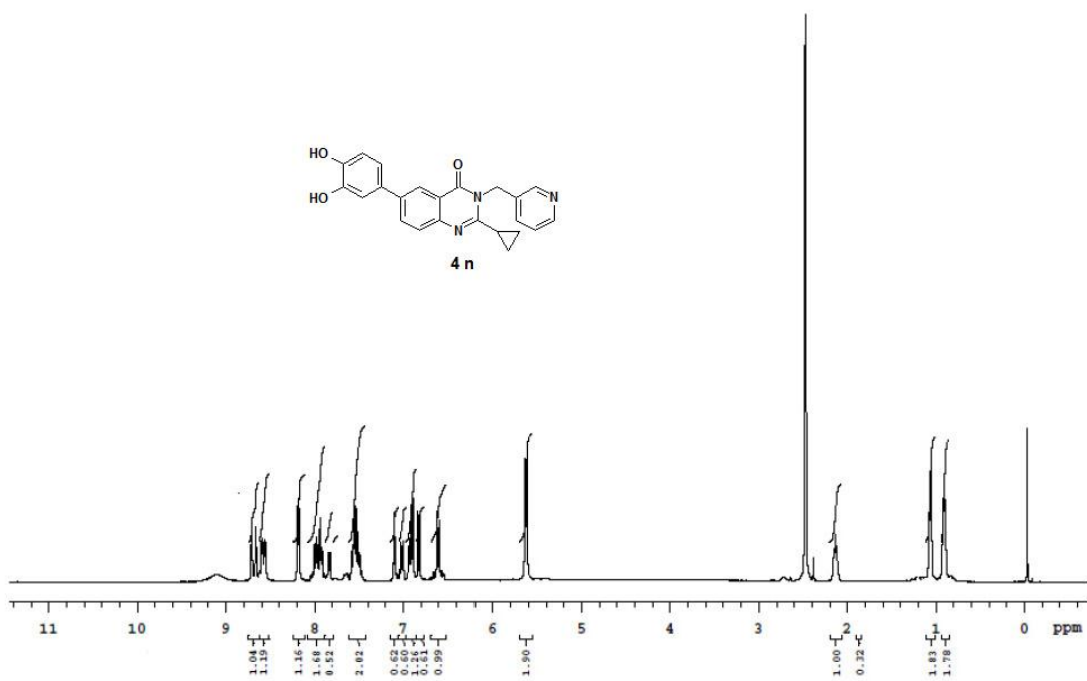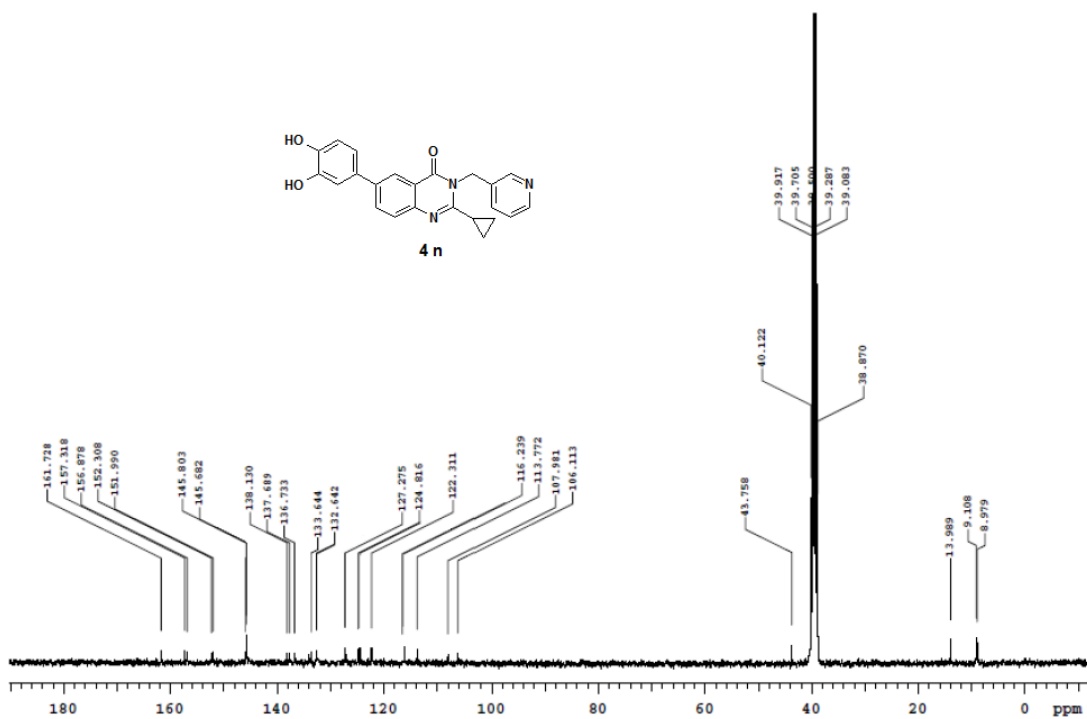

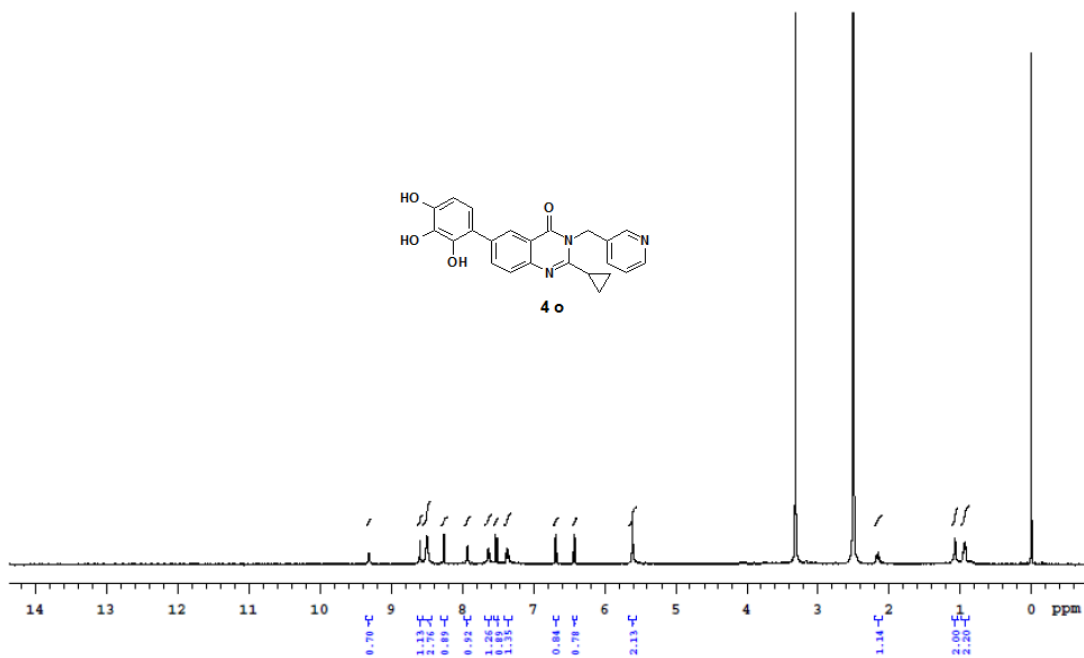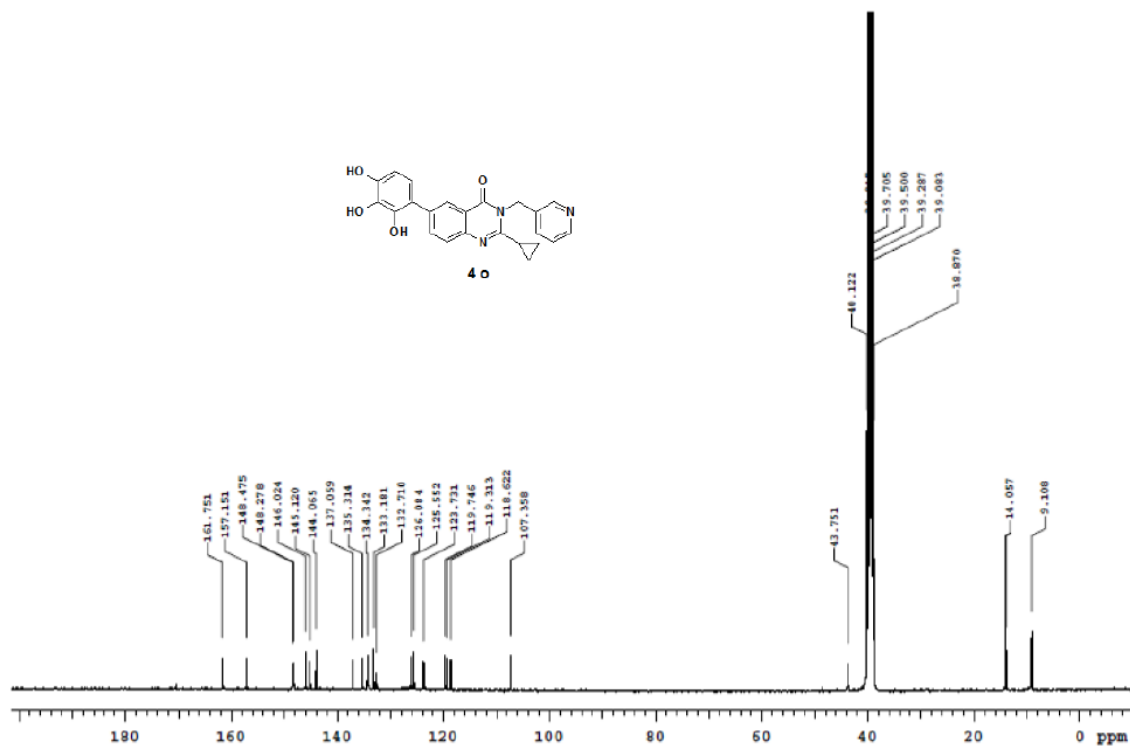

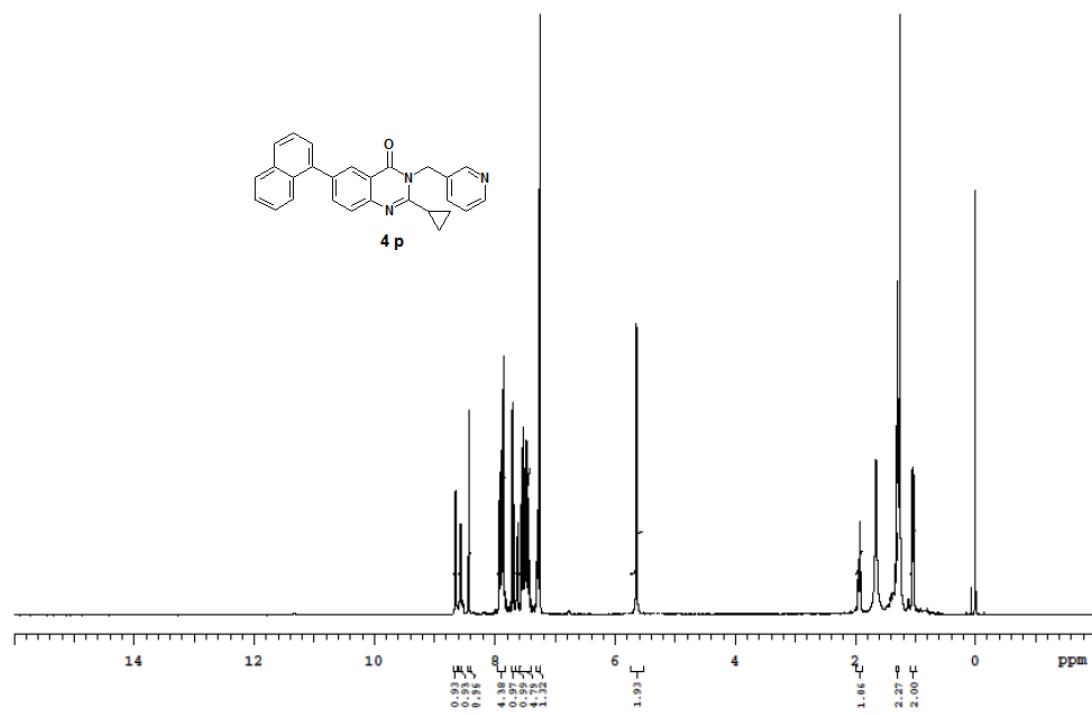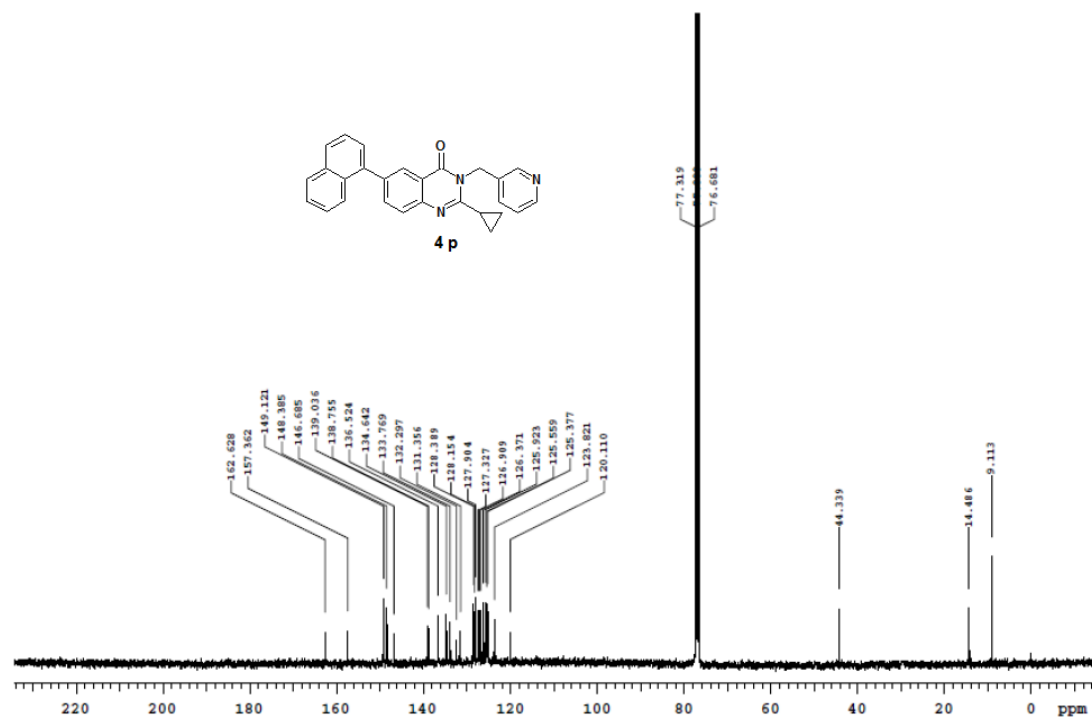

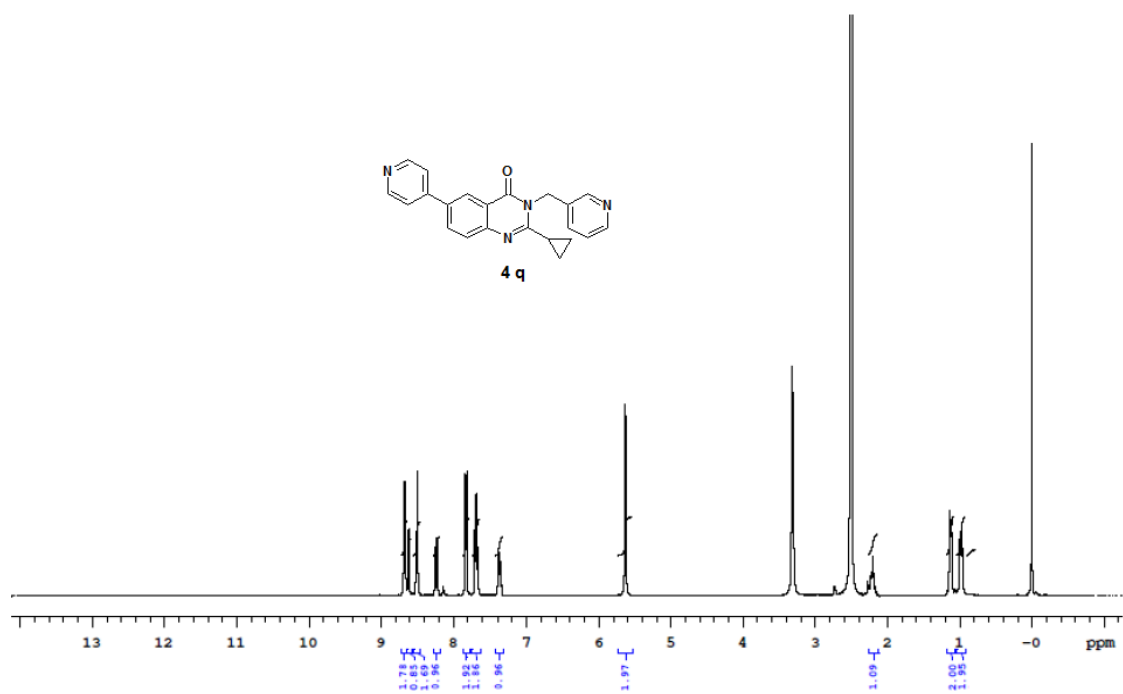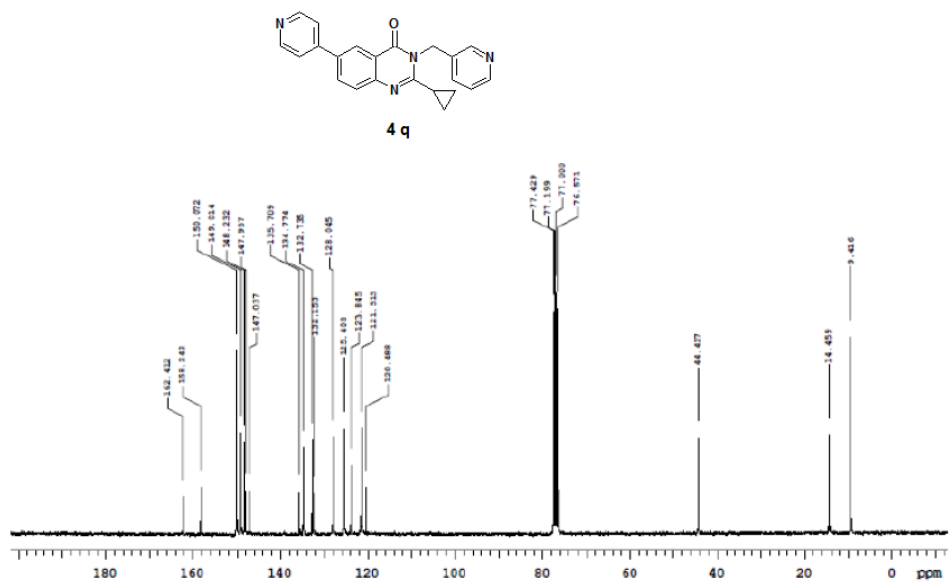

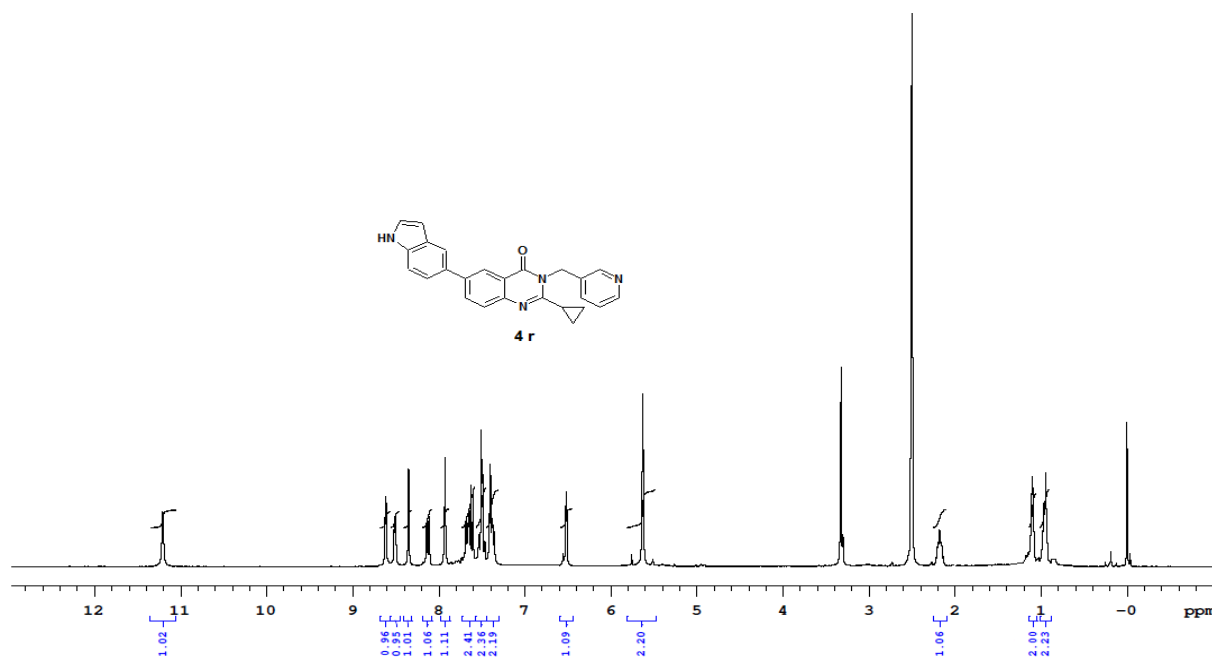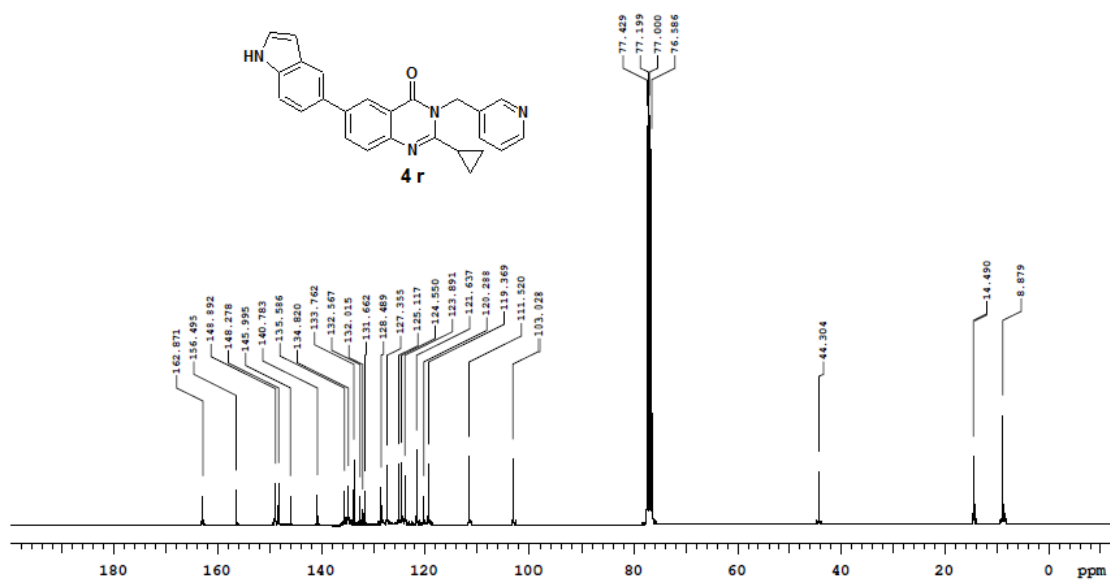

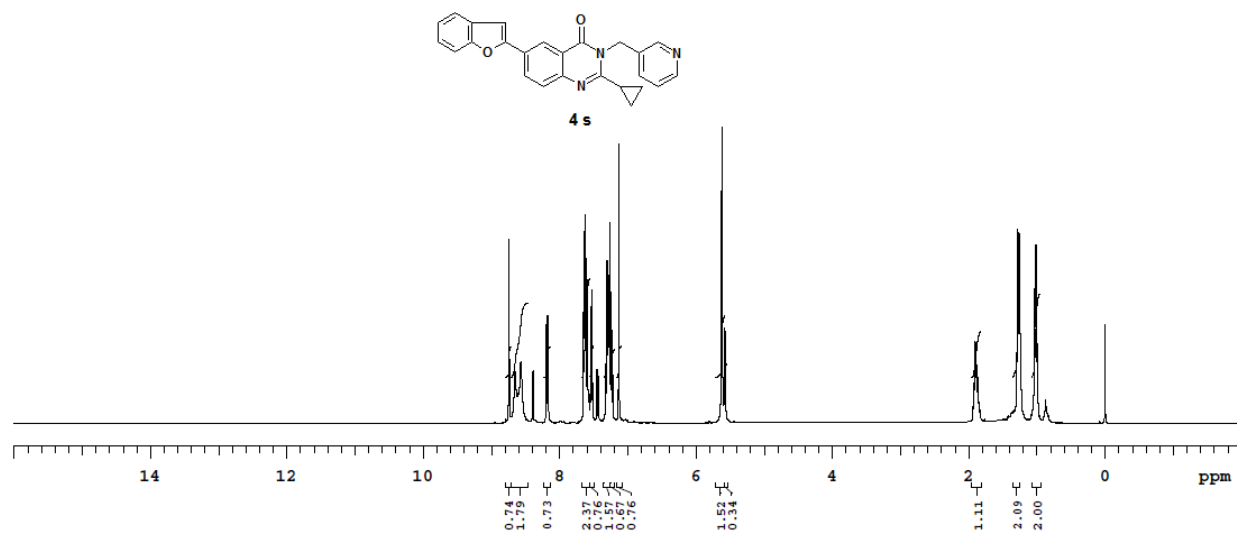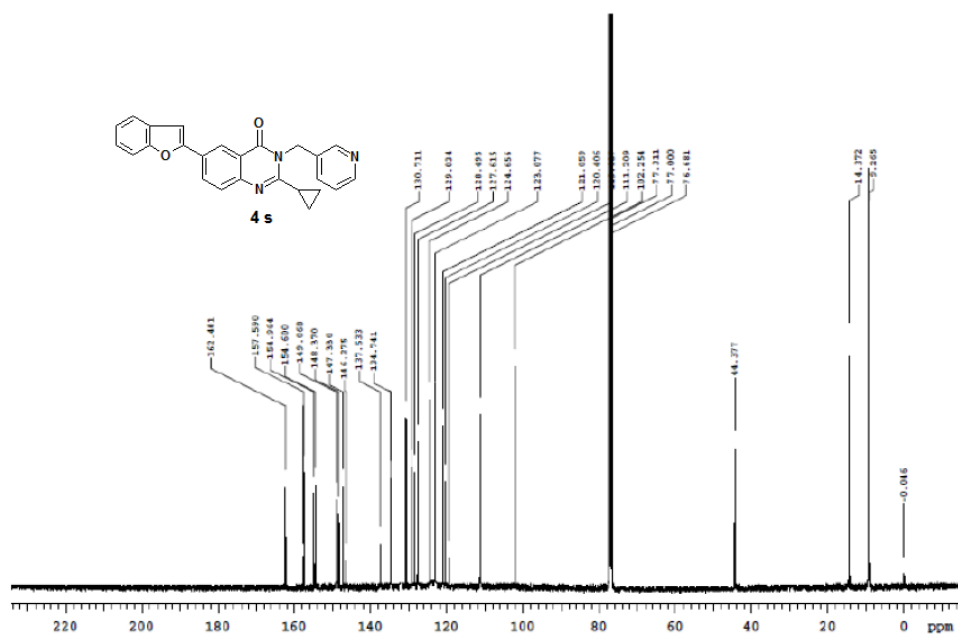



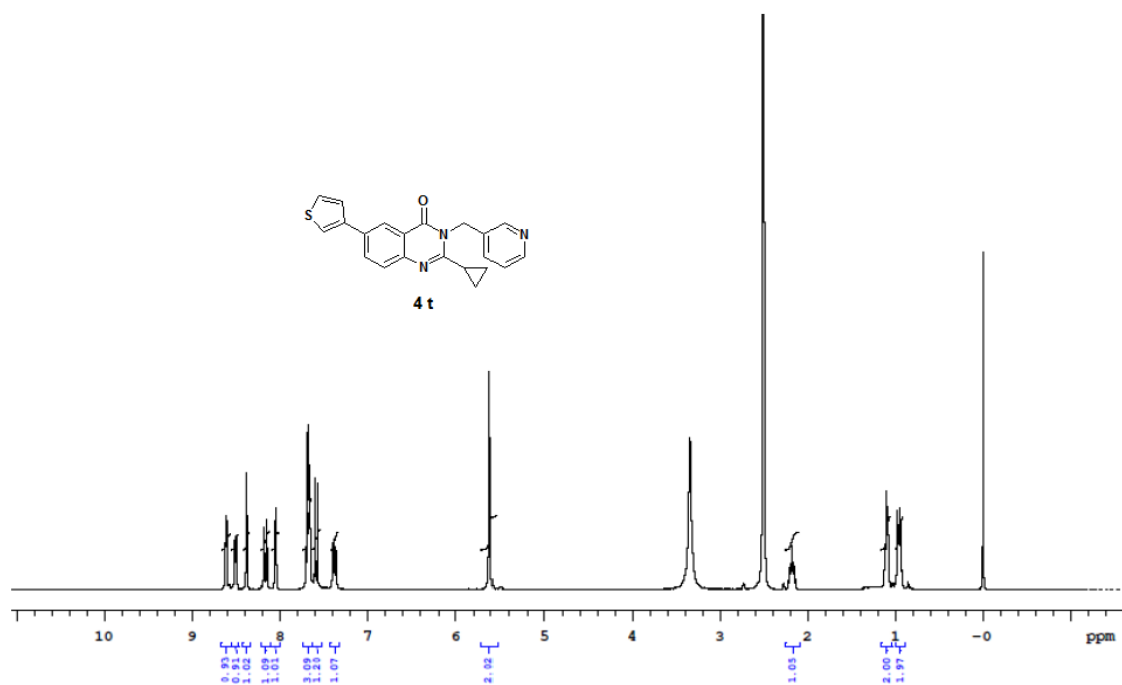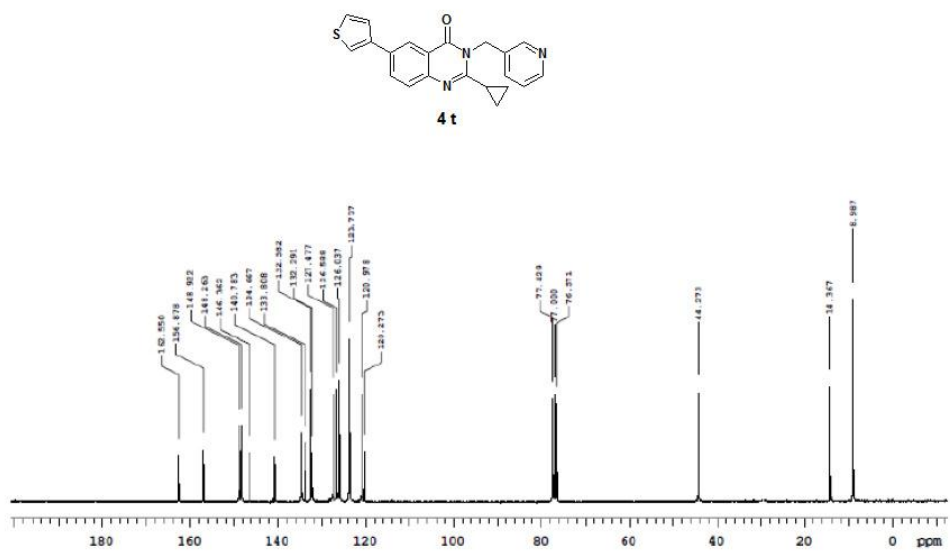

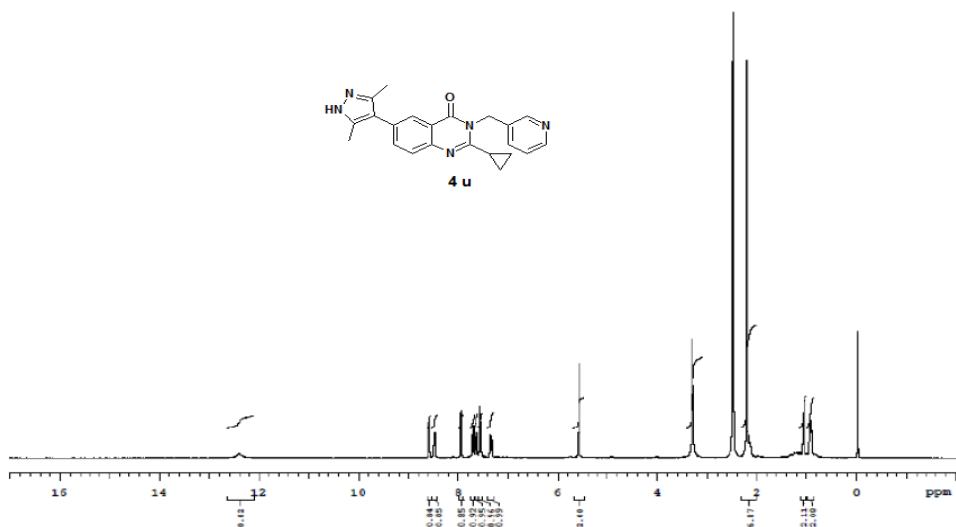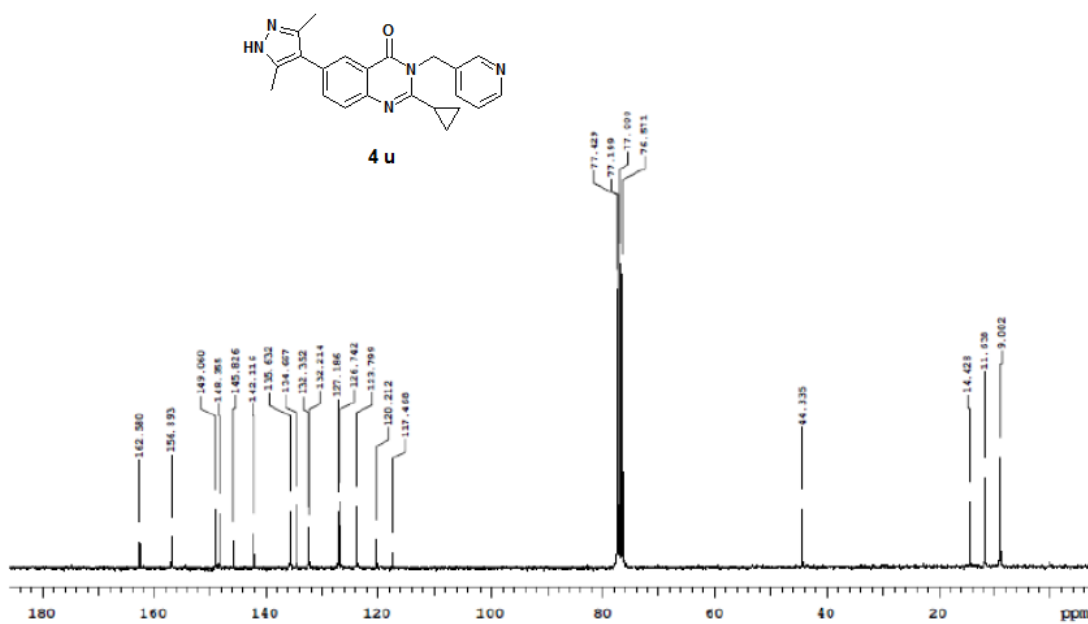

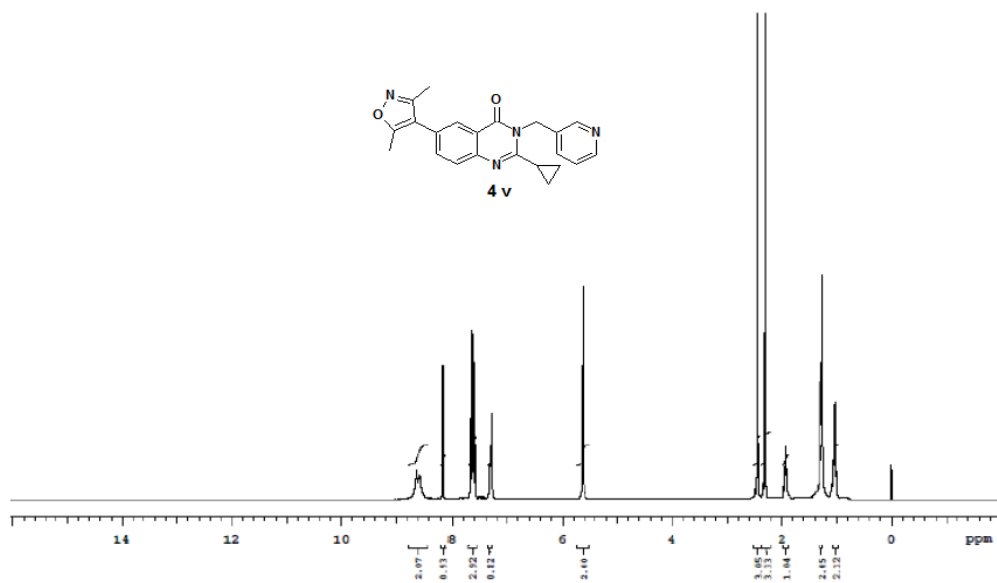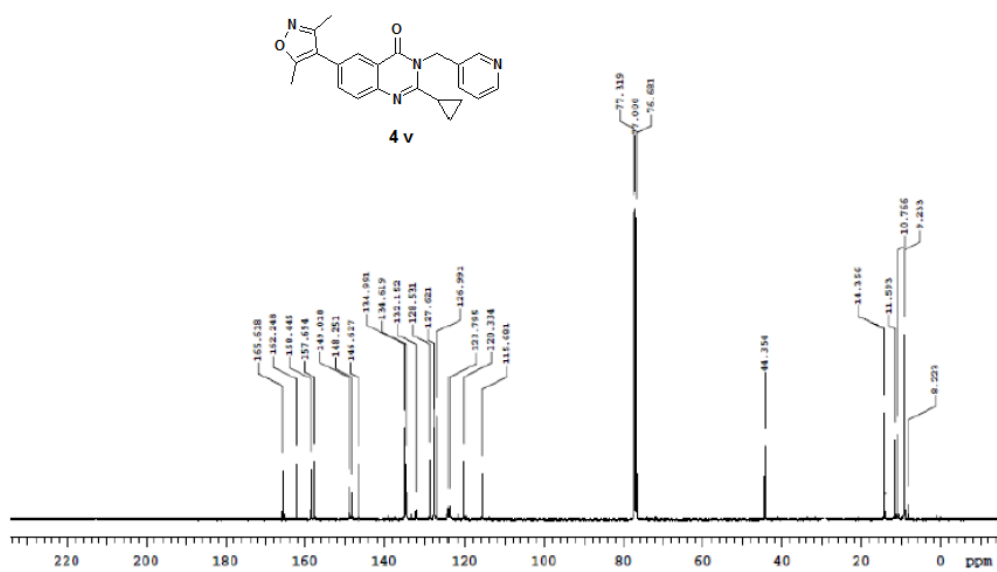

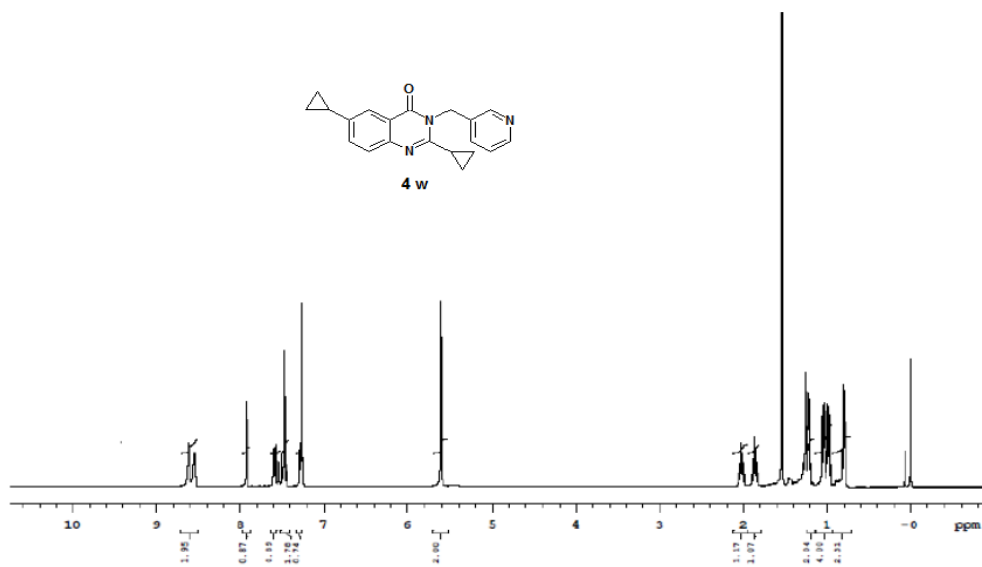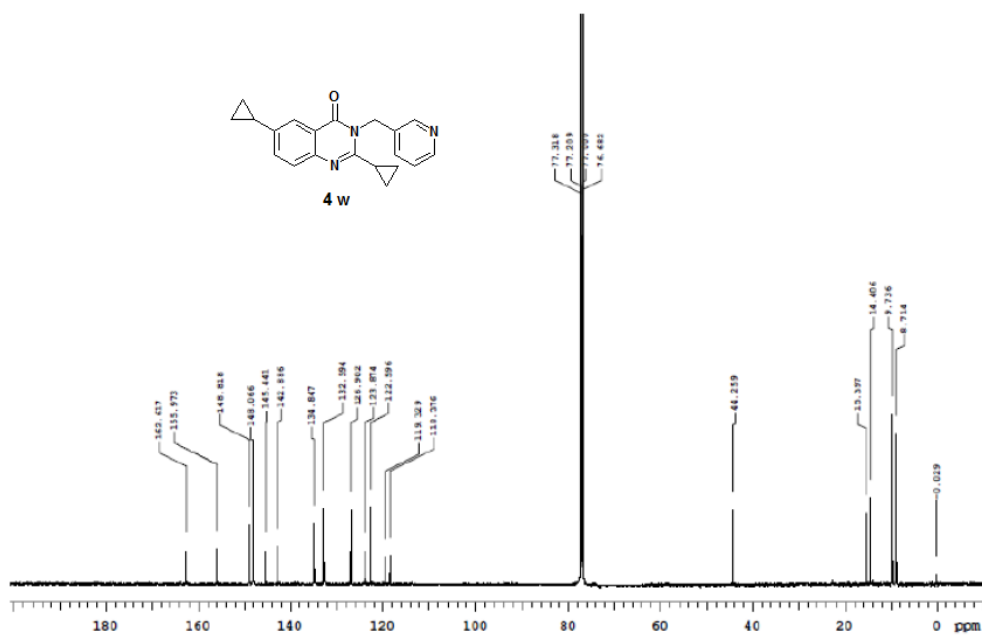

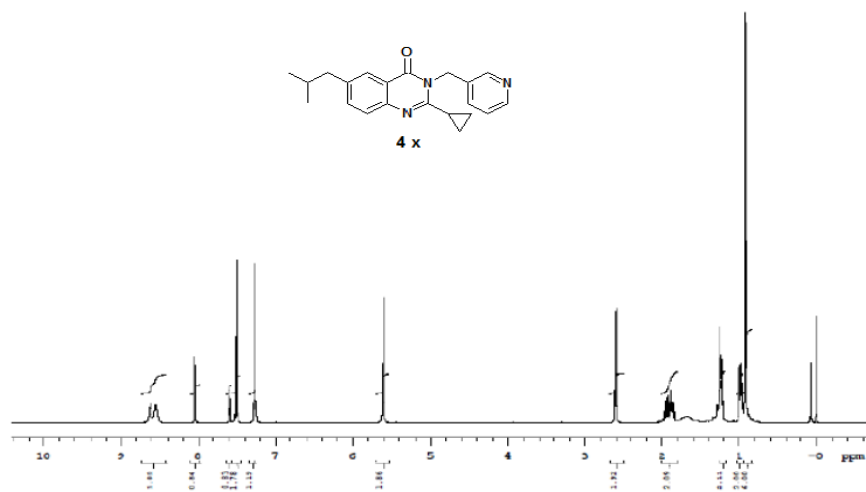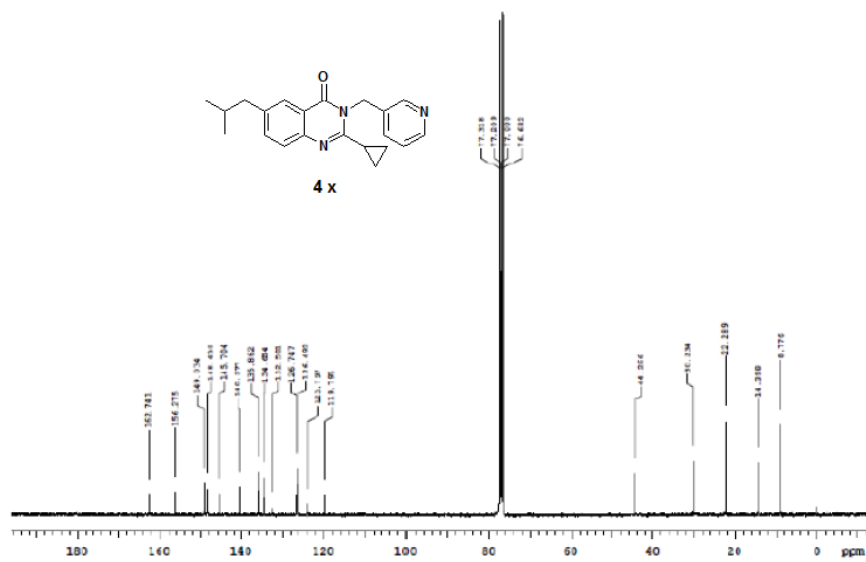

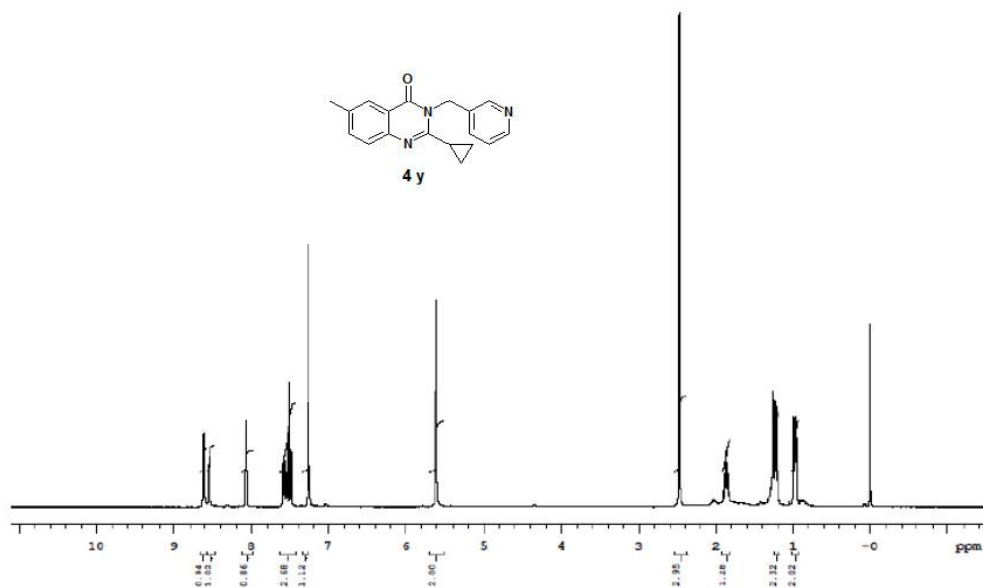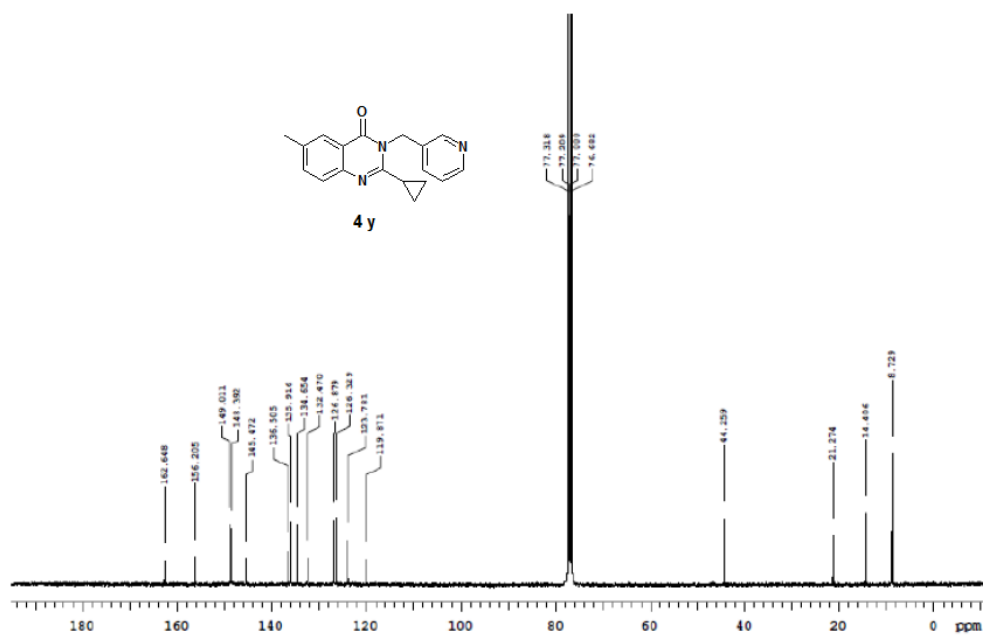

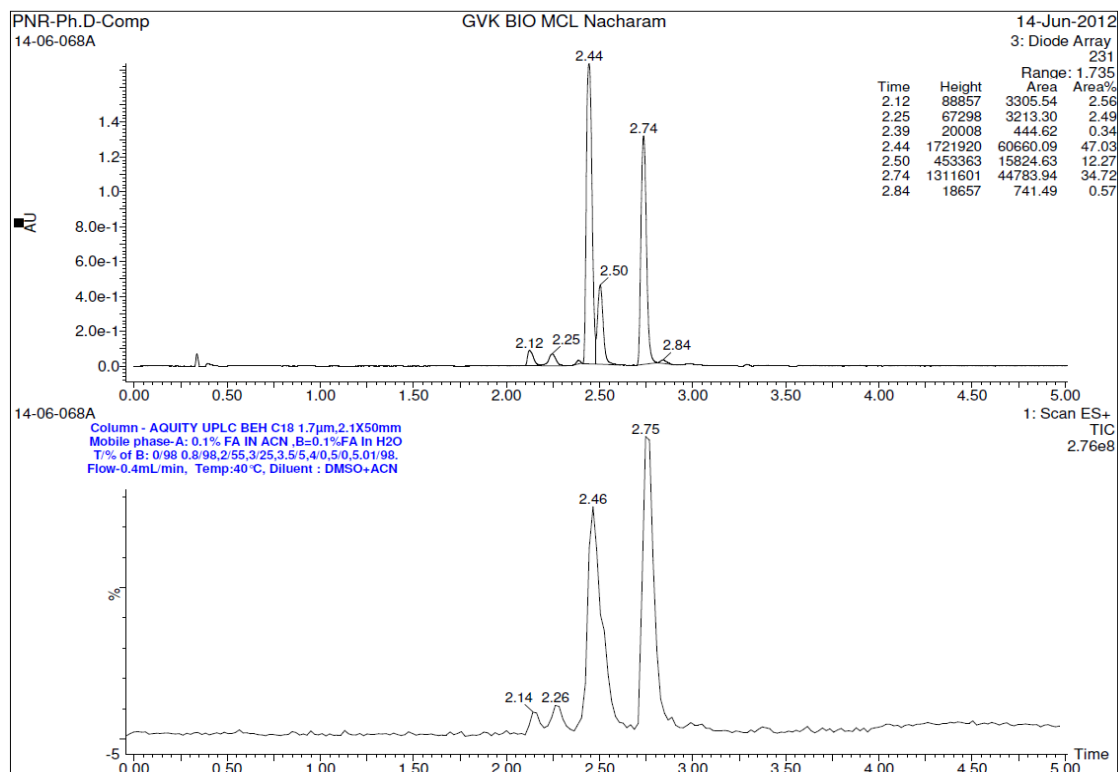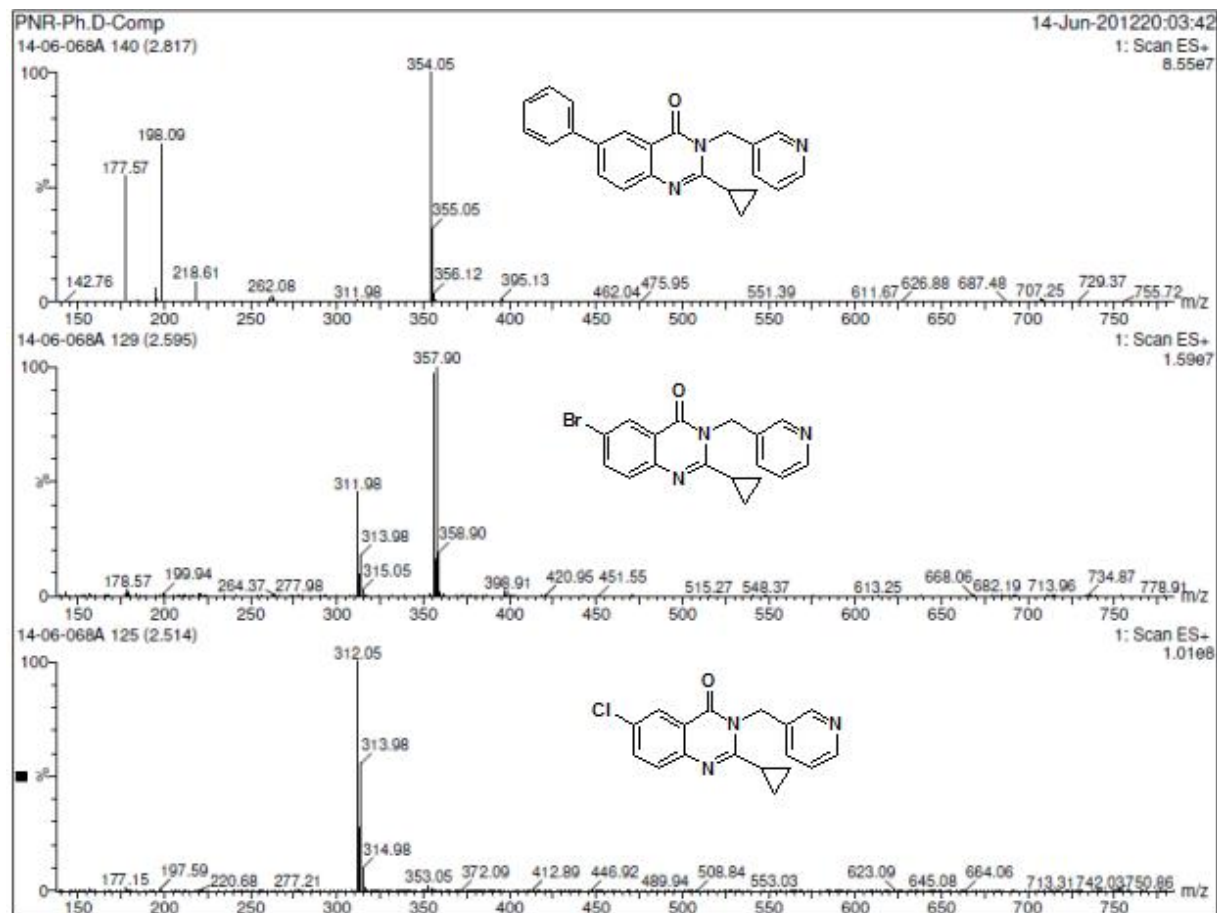

Supplement: c3ob40636a.pdf [file c3ob40636a.pdf]
